# Supplementary material
Source: PubMed Central journal article supplement (PMC6124526)
Supplement: jciinsight-3-120682-s289.pdf [file jciinsight-3-120682-s289.pdf]

938 **Figure S1**

939 Schematic of the in silico TCRminer and MiXCR validation.

940 1,000 in silico simulated alpha, beta, gamma and delta TCR repertoires were created.

941 Then, 100,000 simulated 80 bp RNA-Seq reads were generated using R package

942 Polyester(50). Number of reads recovered by TCRminer and MiXCR are shown.

943

944 **Figure S2**

945 TCR gene segment recovery from in silico-generated simulated NGS TCR reads by

946 TCRminer and MiXCR. V and J sequences were extracted from simulated RNA-Seq

947 datasets using MiXCR or TCRMiner. The abundance of the recovered TCR sequences

948 is plotted along the Y-axis. The abundance of the simulated TCR sequences is plotted  
949 on the X-axis.

950

### 951 **Figure S3**

952 TCR gene correlations with T cell surface markers and transcription factors. For all  
953 graphs, discovery RNA-Seq dataset was used and the Spearman correlation  
954 coefficients and p-values are displayed on each plot. P-values for Spearman's test were  
955 calculated using the asymptotic t approximation. Significant correlations are outlined in  
956 blue. Psoriasis RNA-Seq datasets are depicted with red dots and healthy control RNA-  
957 Seq datasets are depicted with blue dots. **(A)** Scatter plots of *TRA* versus *TRB* and  
958 *TRG* versus *TRD* gene expression correlation levels in psoriatic plaque samples are  
959 shown. **(B)** Expression of *CCR6*, a psoriasis-associated T cell marker, correlated with  
960 both *TRB* and *TRD*. **(C)** *CD4* and *CD8A* correlations with *TRB* and *TRD* in healthy  
961 controls. **(D)** *TRB* and *TRD* correlation with transcription factors in psoriatic plaque  
962 samples. **(E)** Correlation of transcription factors with psoriasis-associated cytokines in  
963 psoriatic plaque samples.

964

### 965 **Figure S4**

966 Meta-analysis of *TRGV5*, *TRAJ39* and *TRBV3-1* correlations with psoriasis-relevant  
967 cytokines. Differences in gene expressions were calculated (normalized gene  
968 expression of non-lesional samples were subtracted from their corresponding  
969 normalized gene expression within the matching lesional sample). Spearman correlation

970 coefficients for differences in gene expressions were then calculated. Forest plots of  
971 correlation coefficients are shown. Each black box is representative of the study weight  
972 for each data set and horizontal lines are 95% CI. Diamonds represent Standardized  
973 Mean Differences for results of all studies combined. Extremes of diamonds give 95%  
974 CI.

975

TRVB

MiXCR

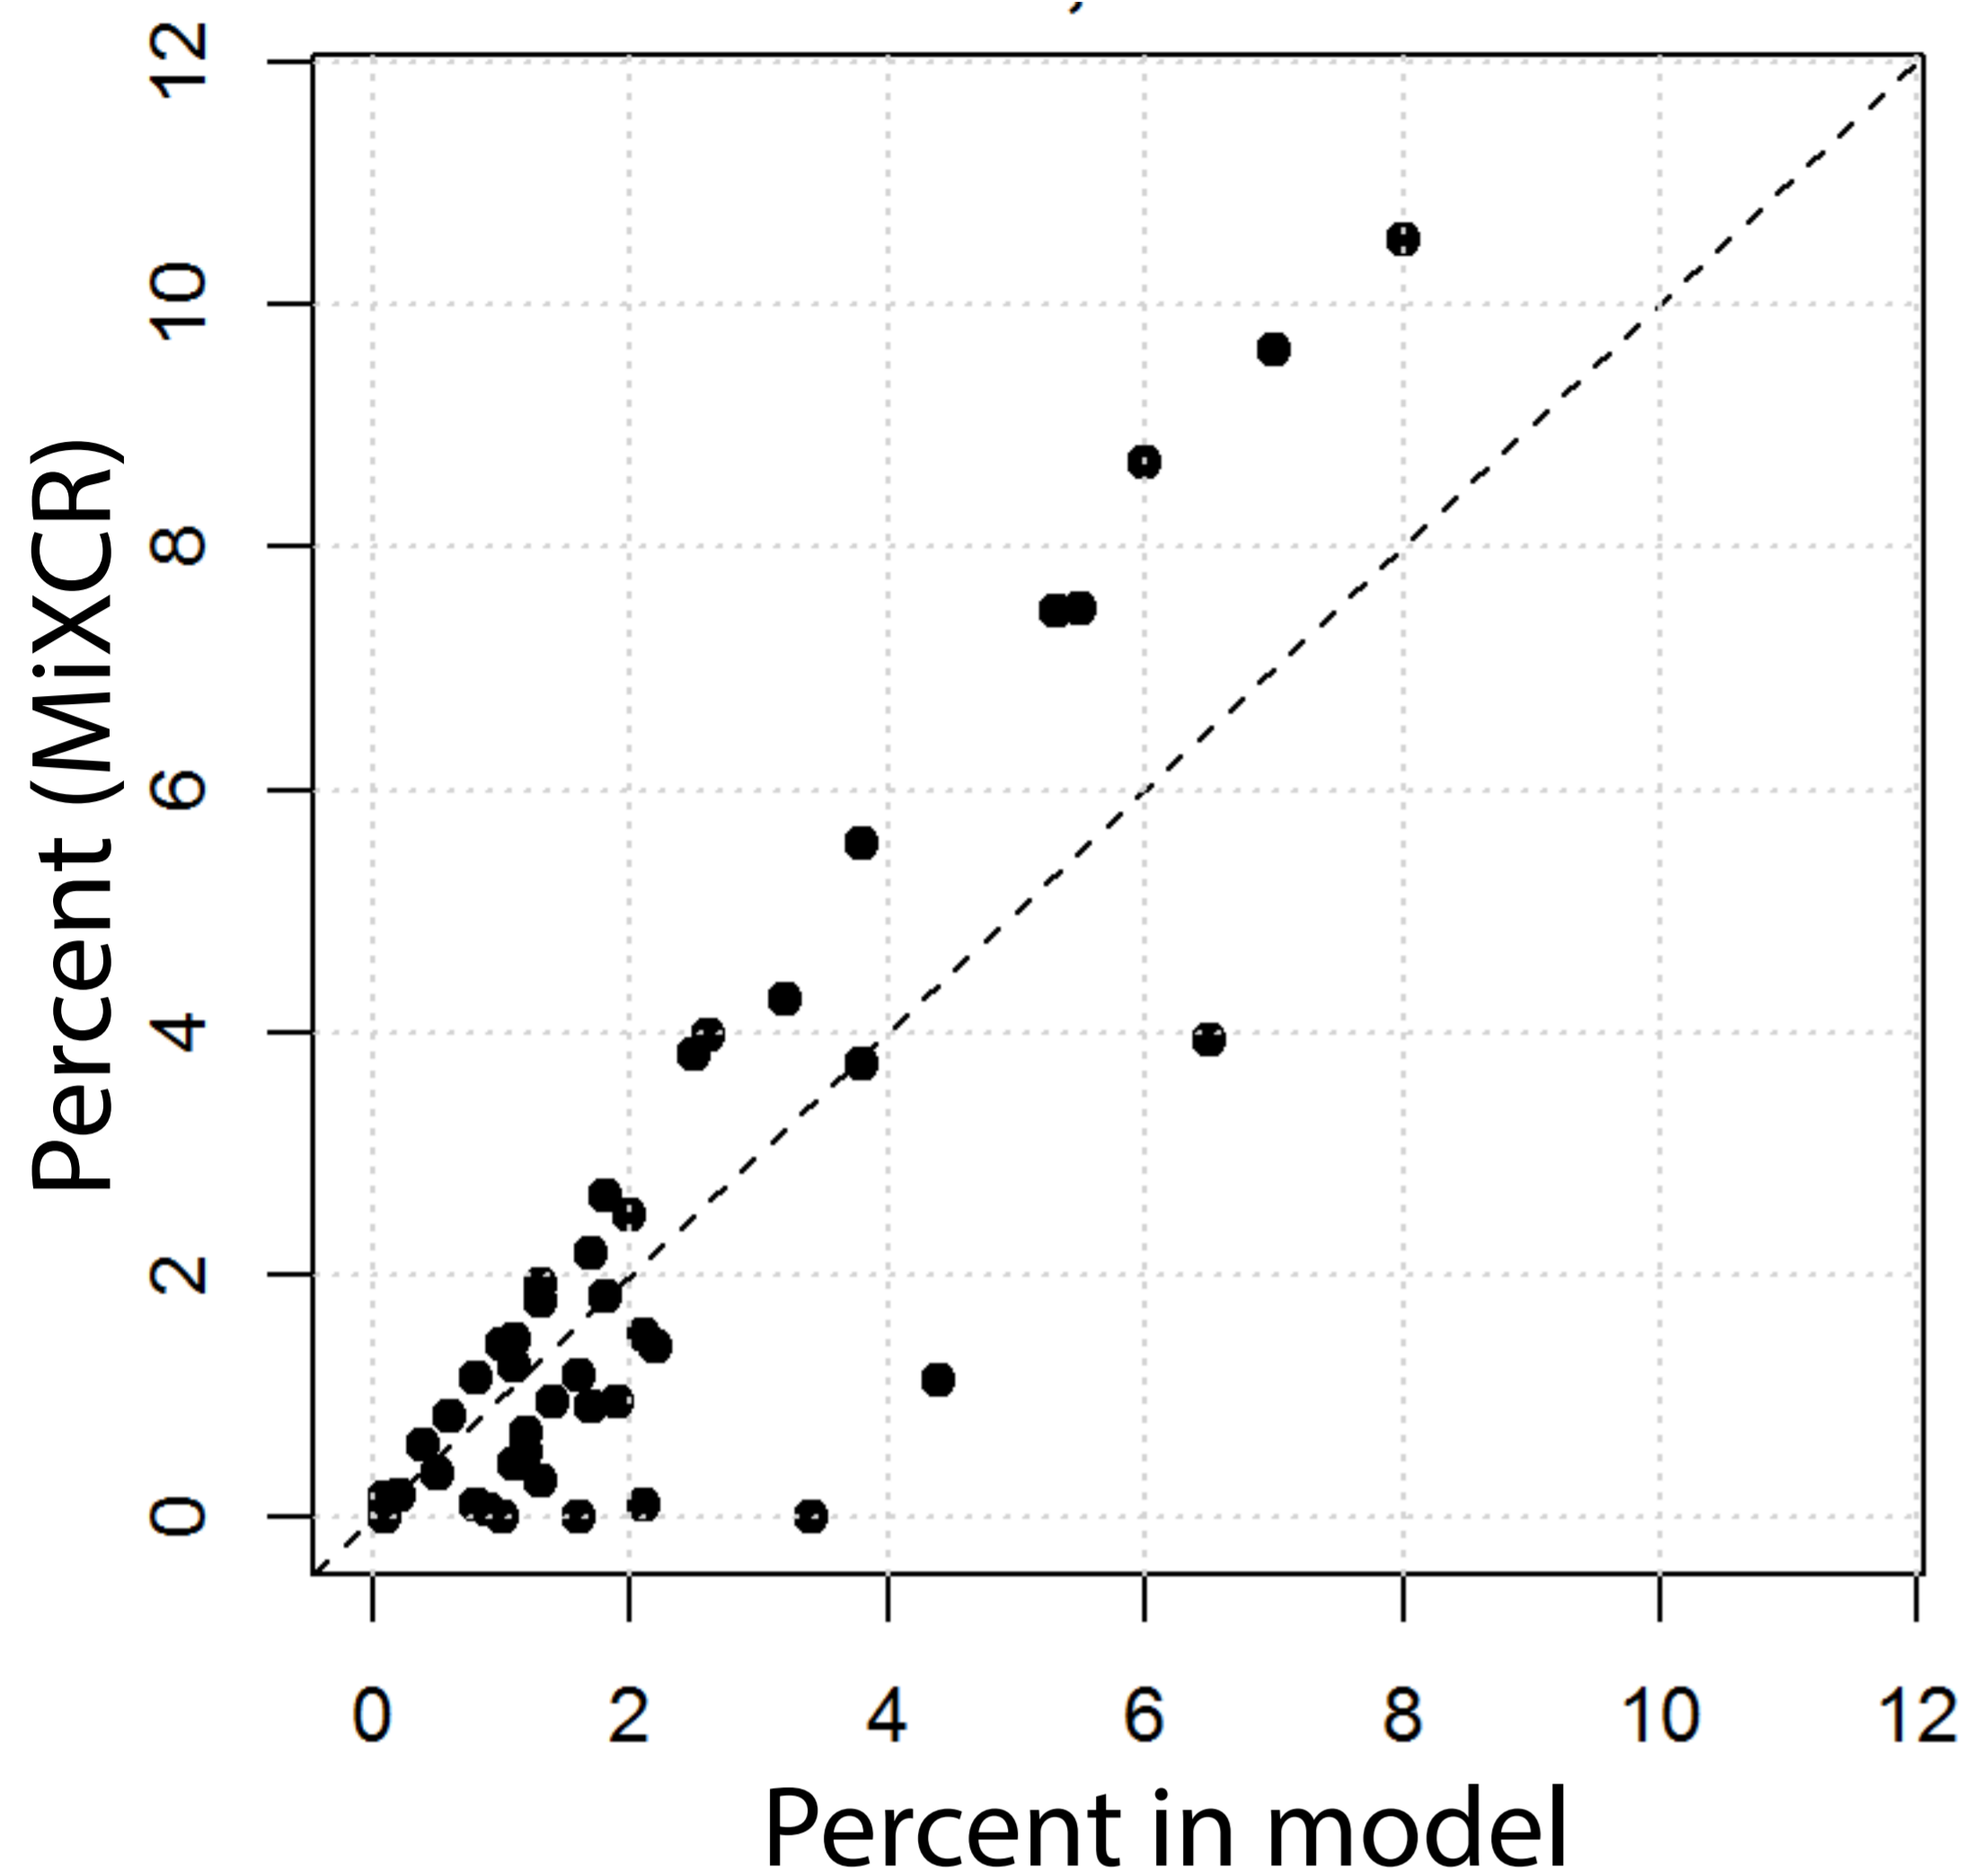

TCRMiner

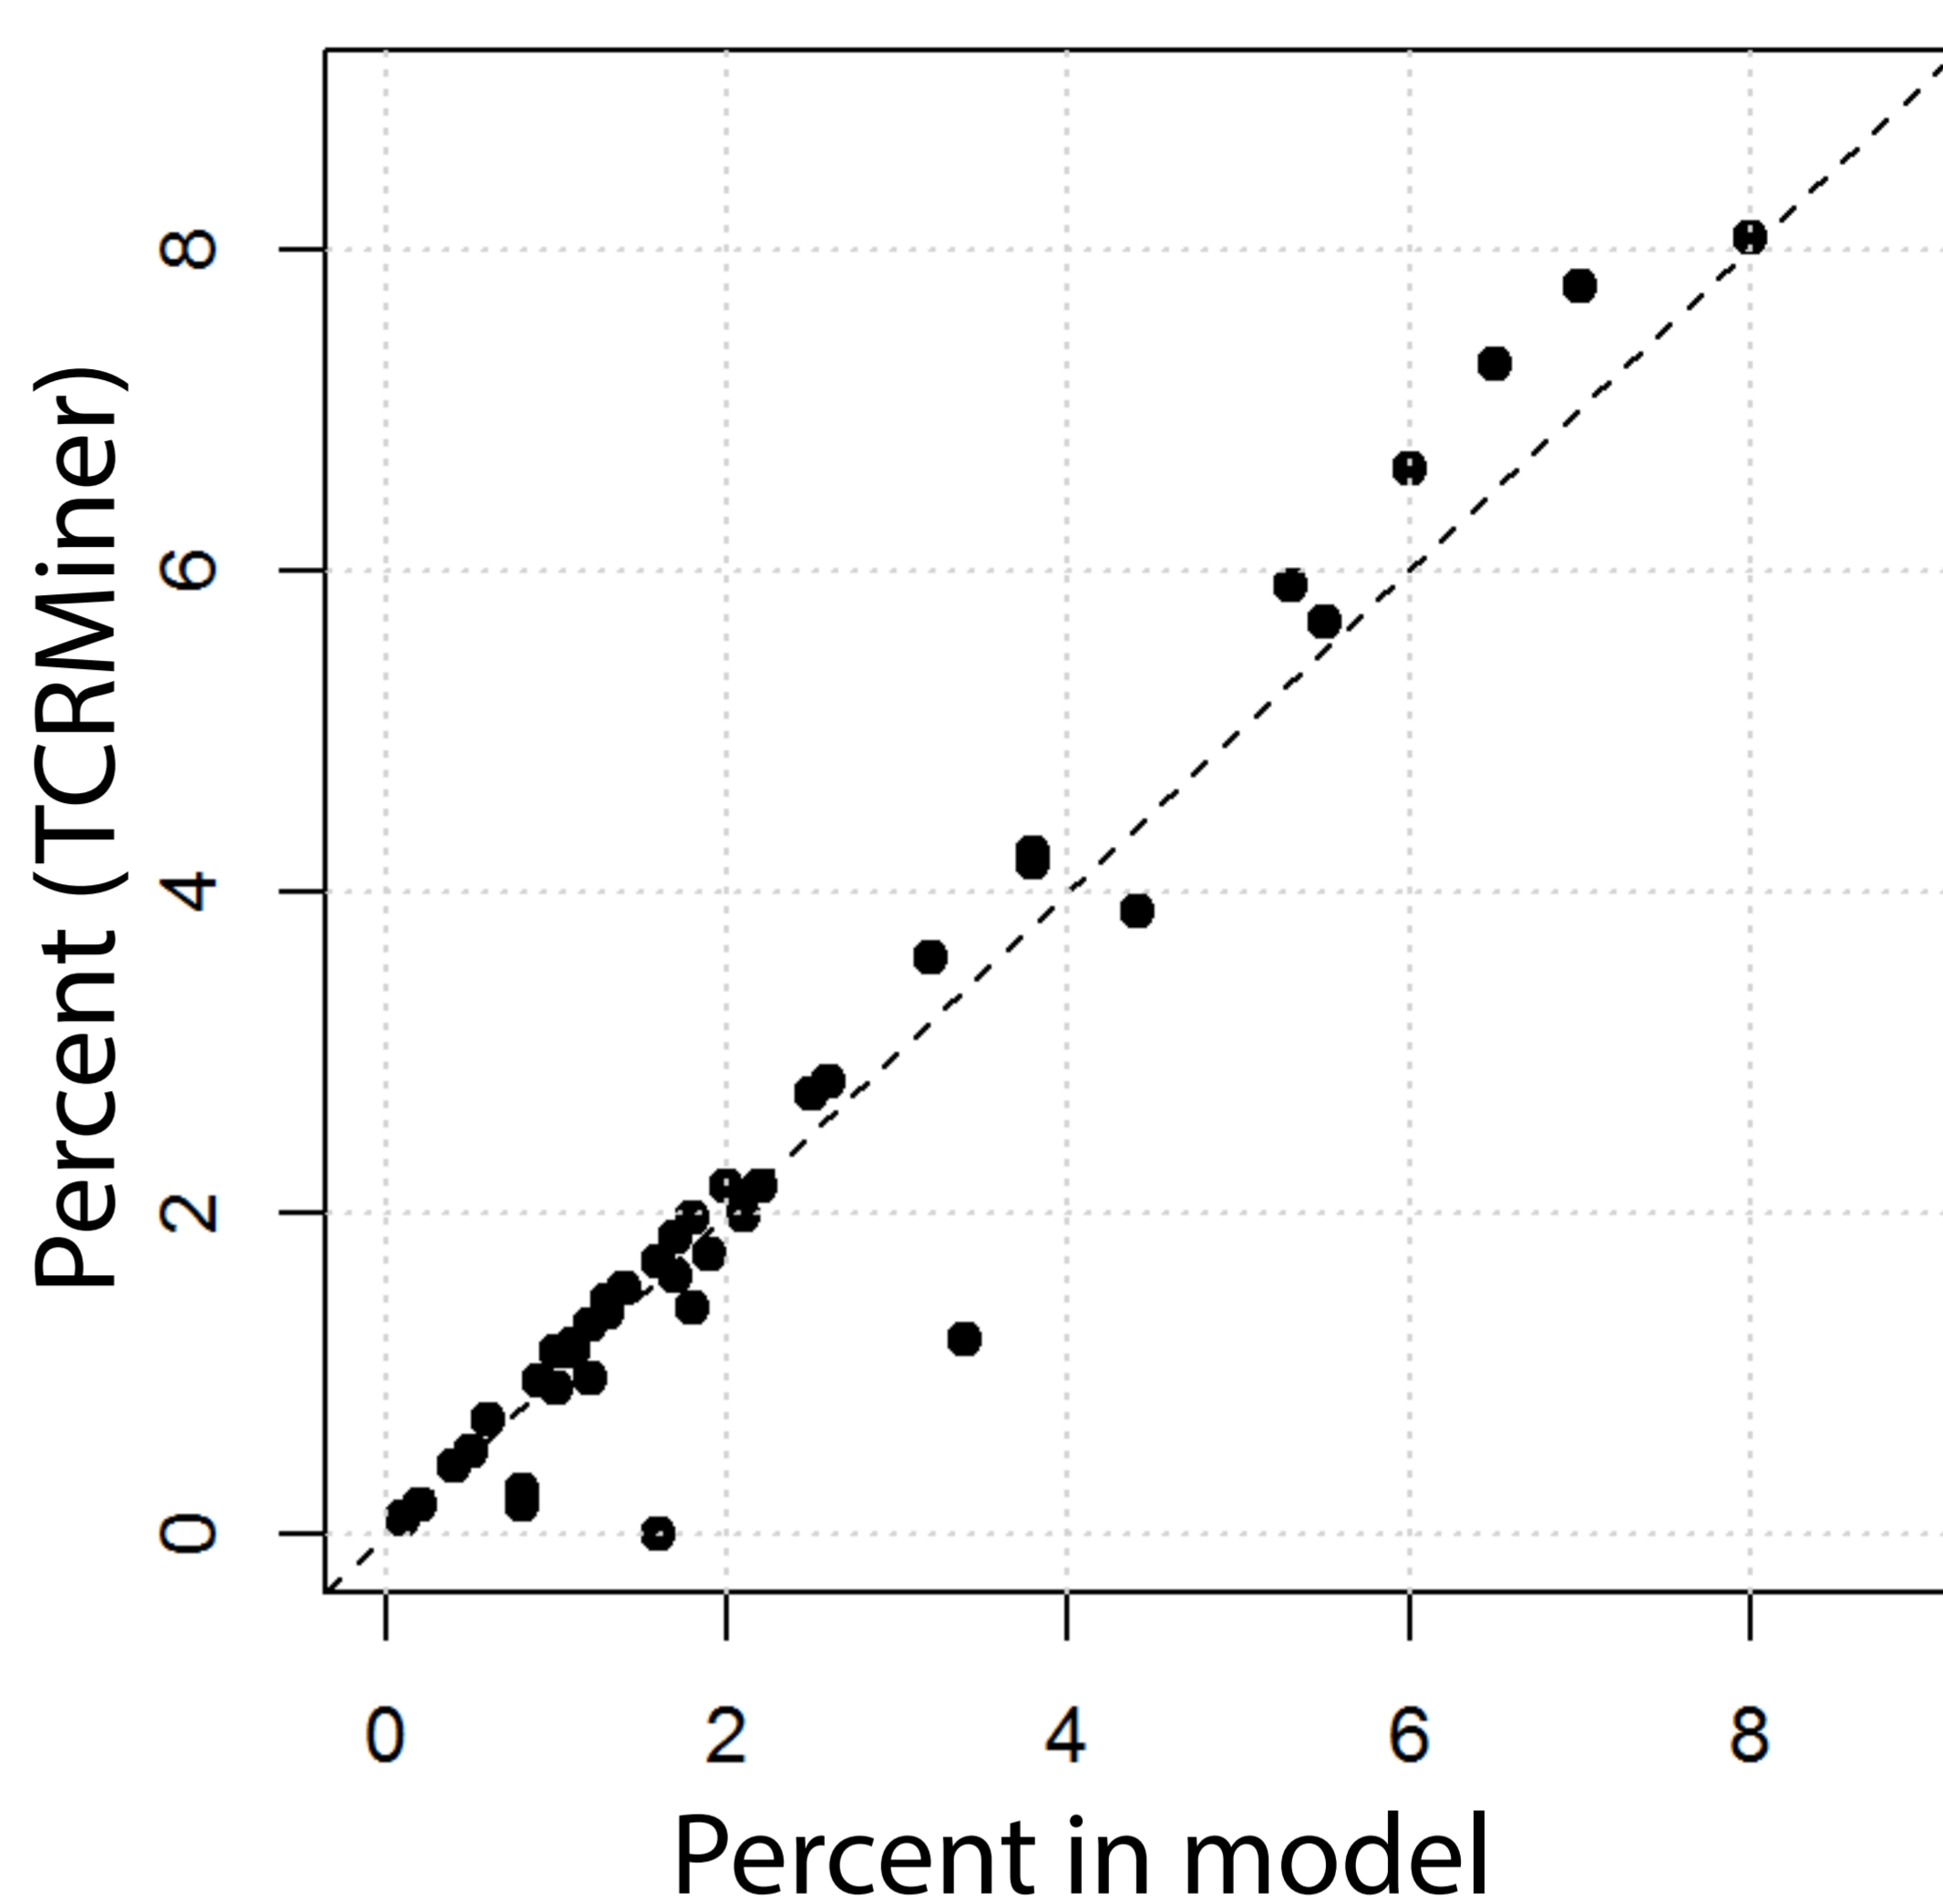

TRAJ

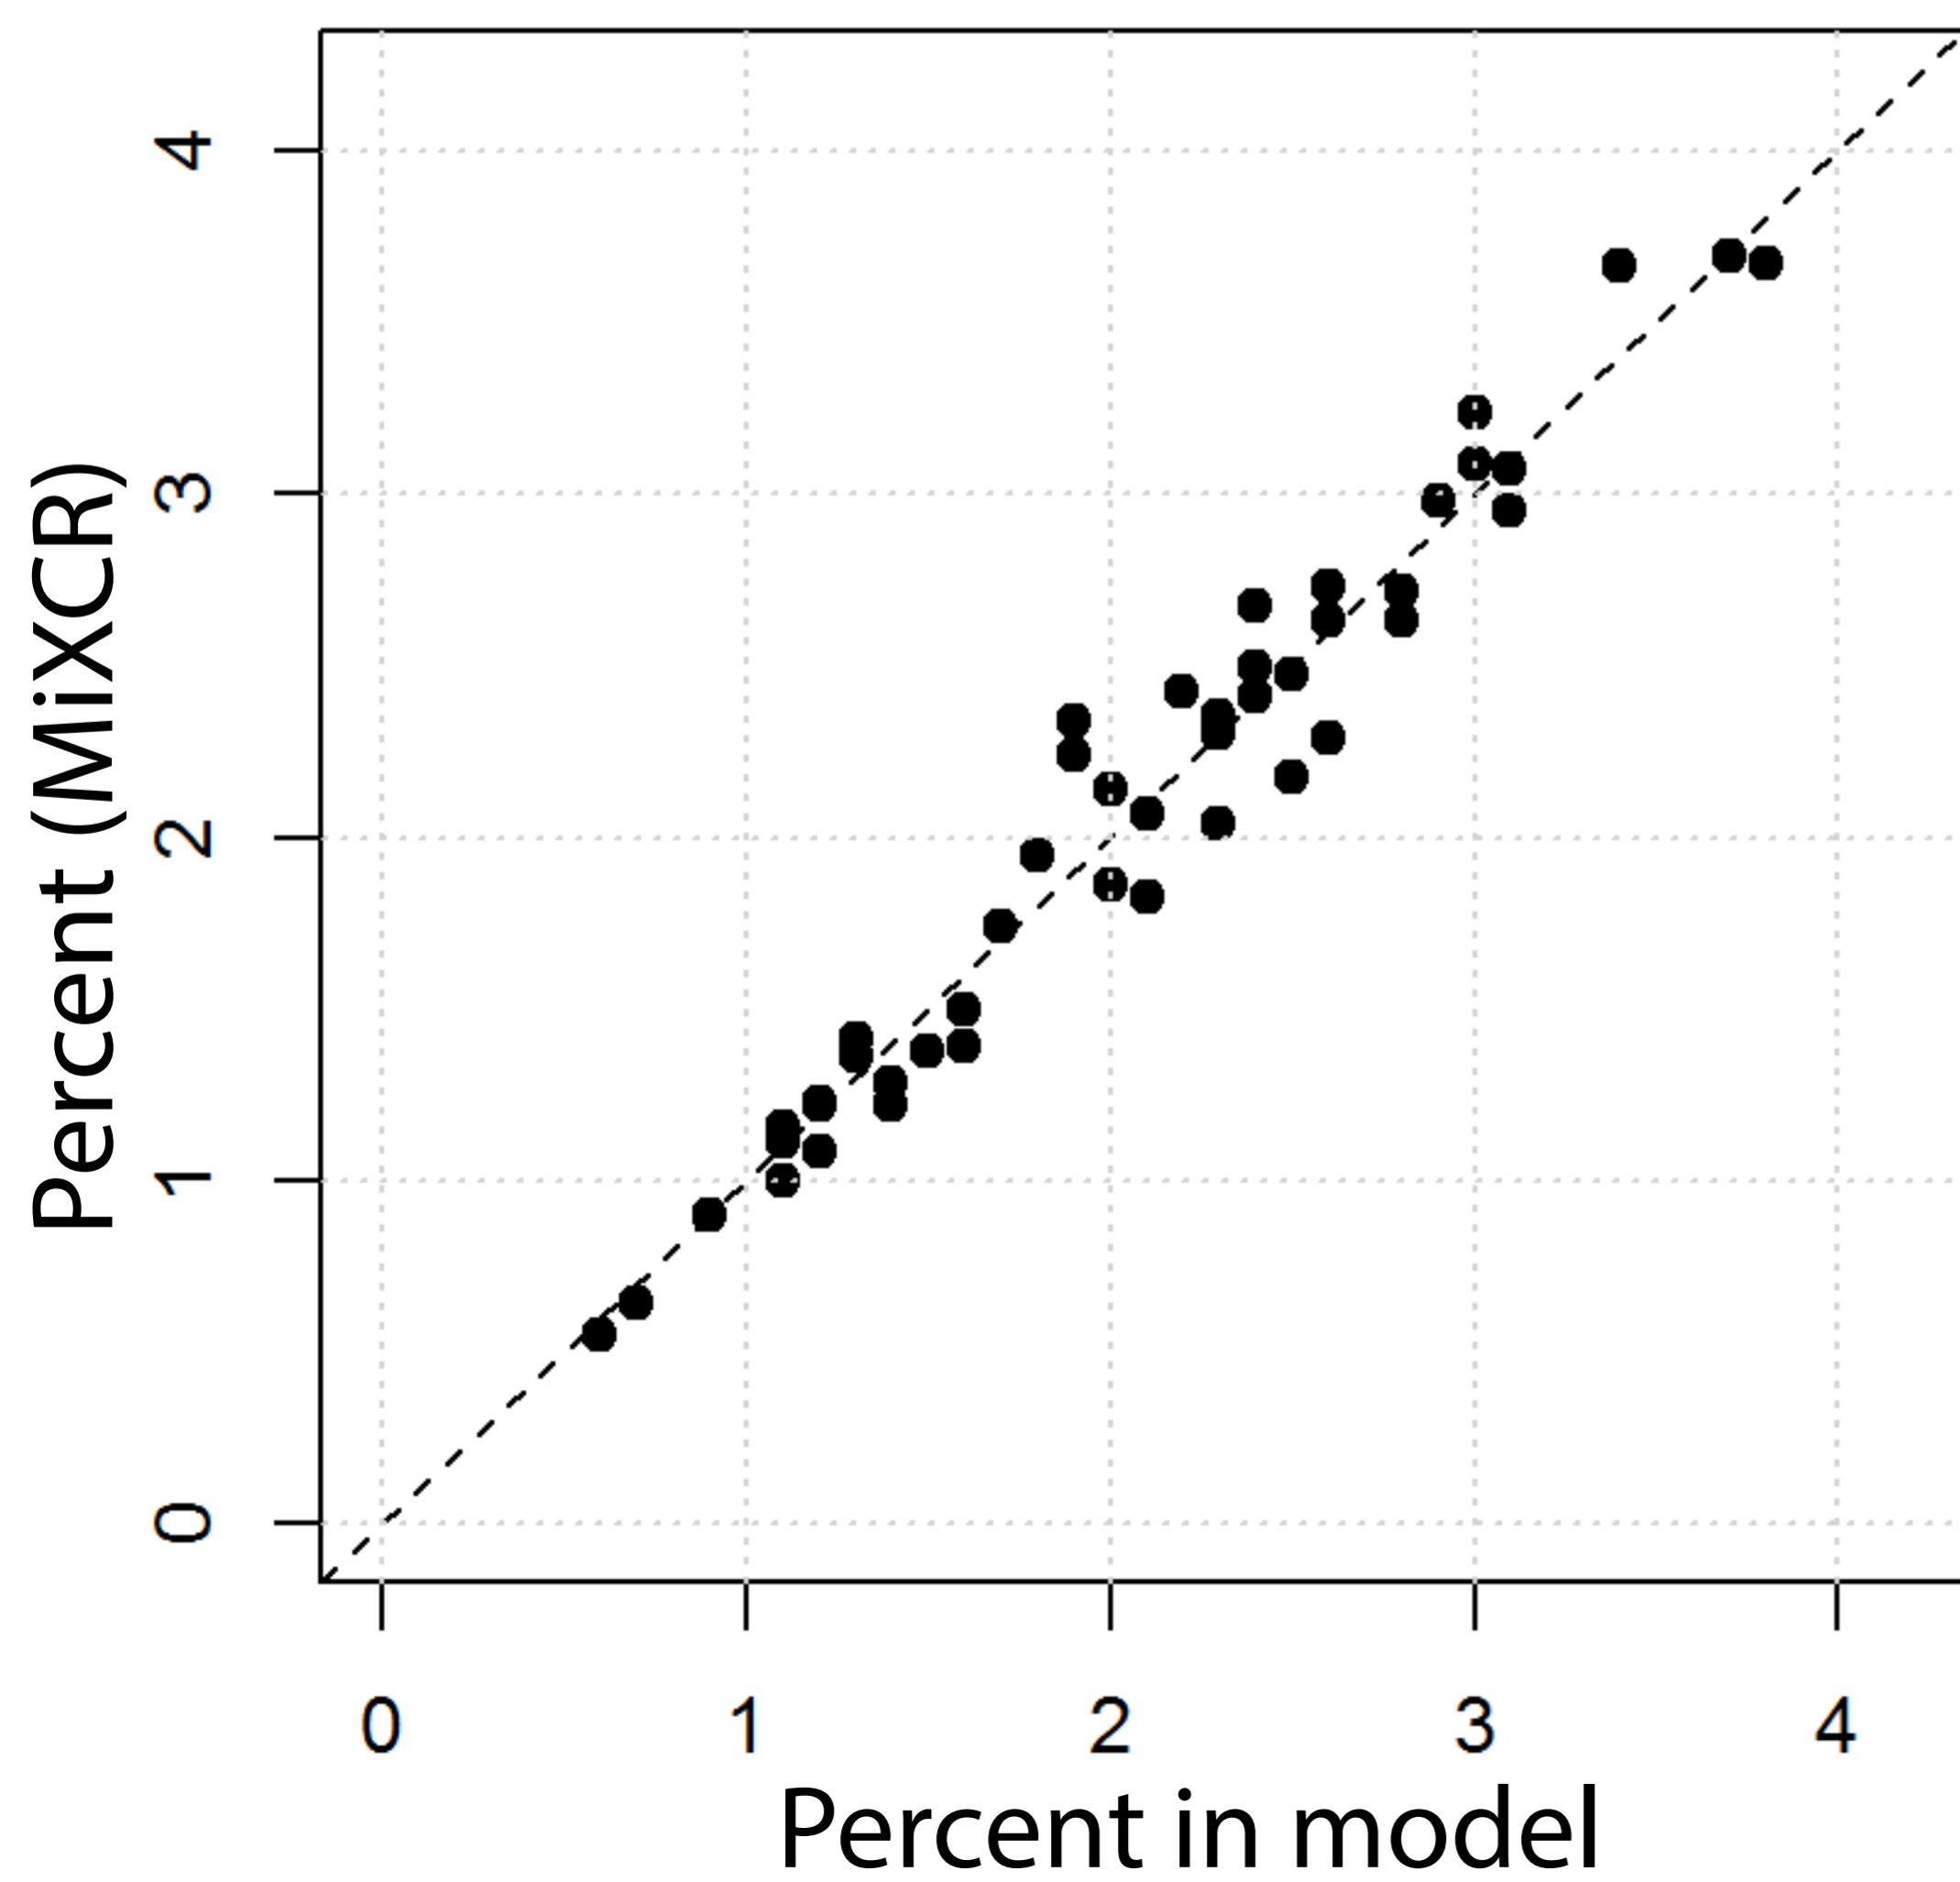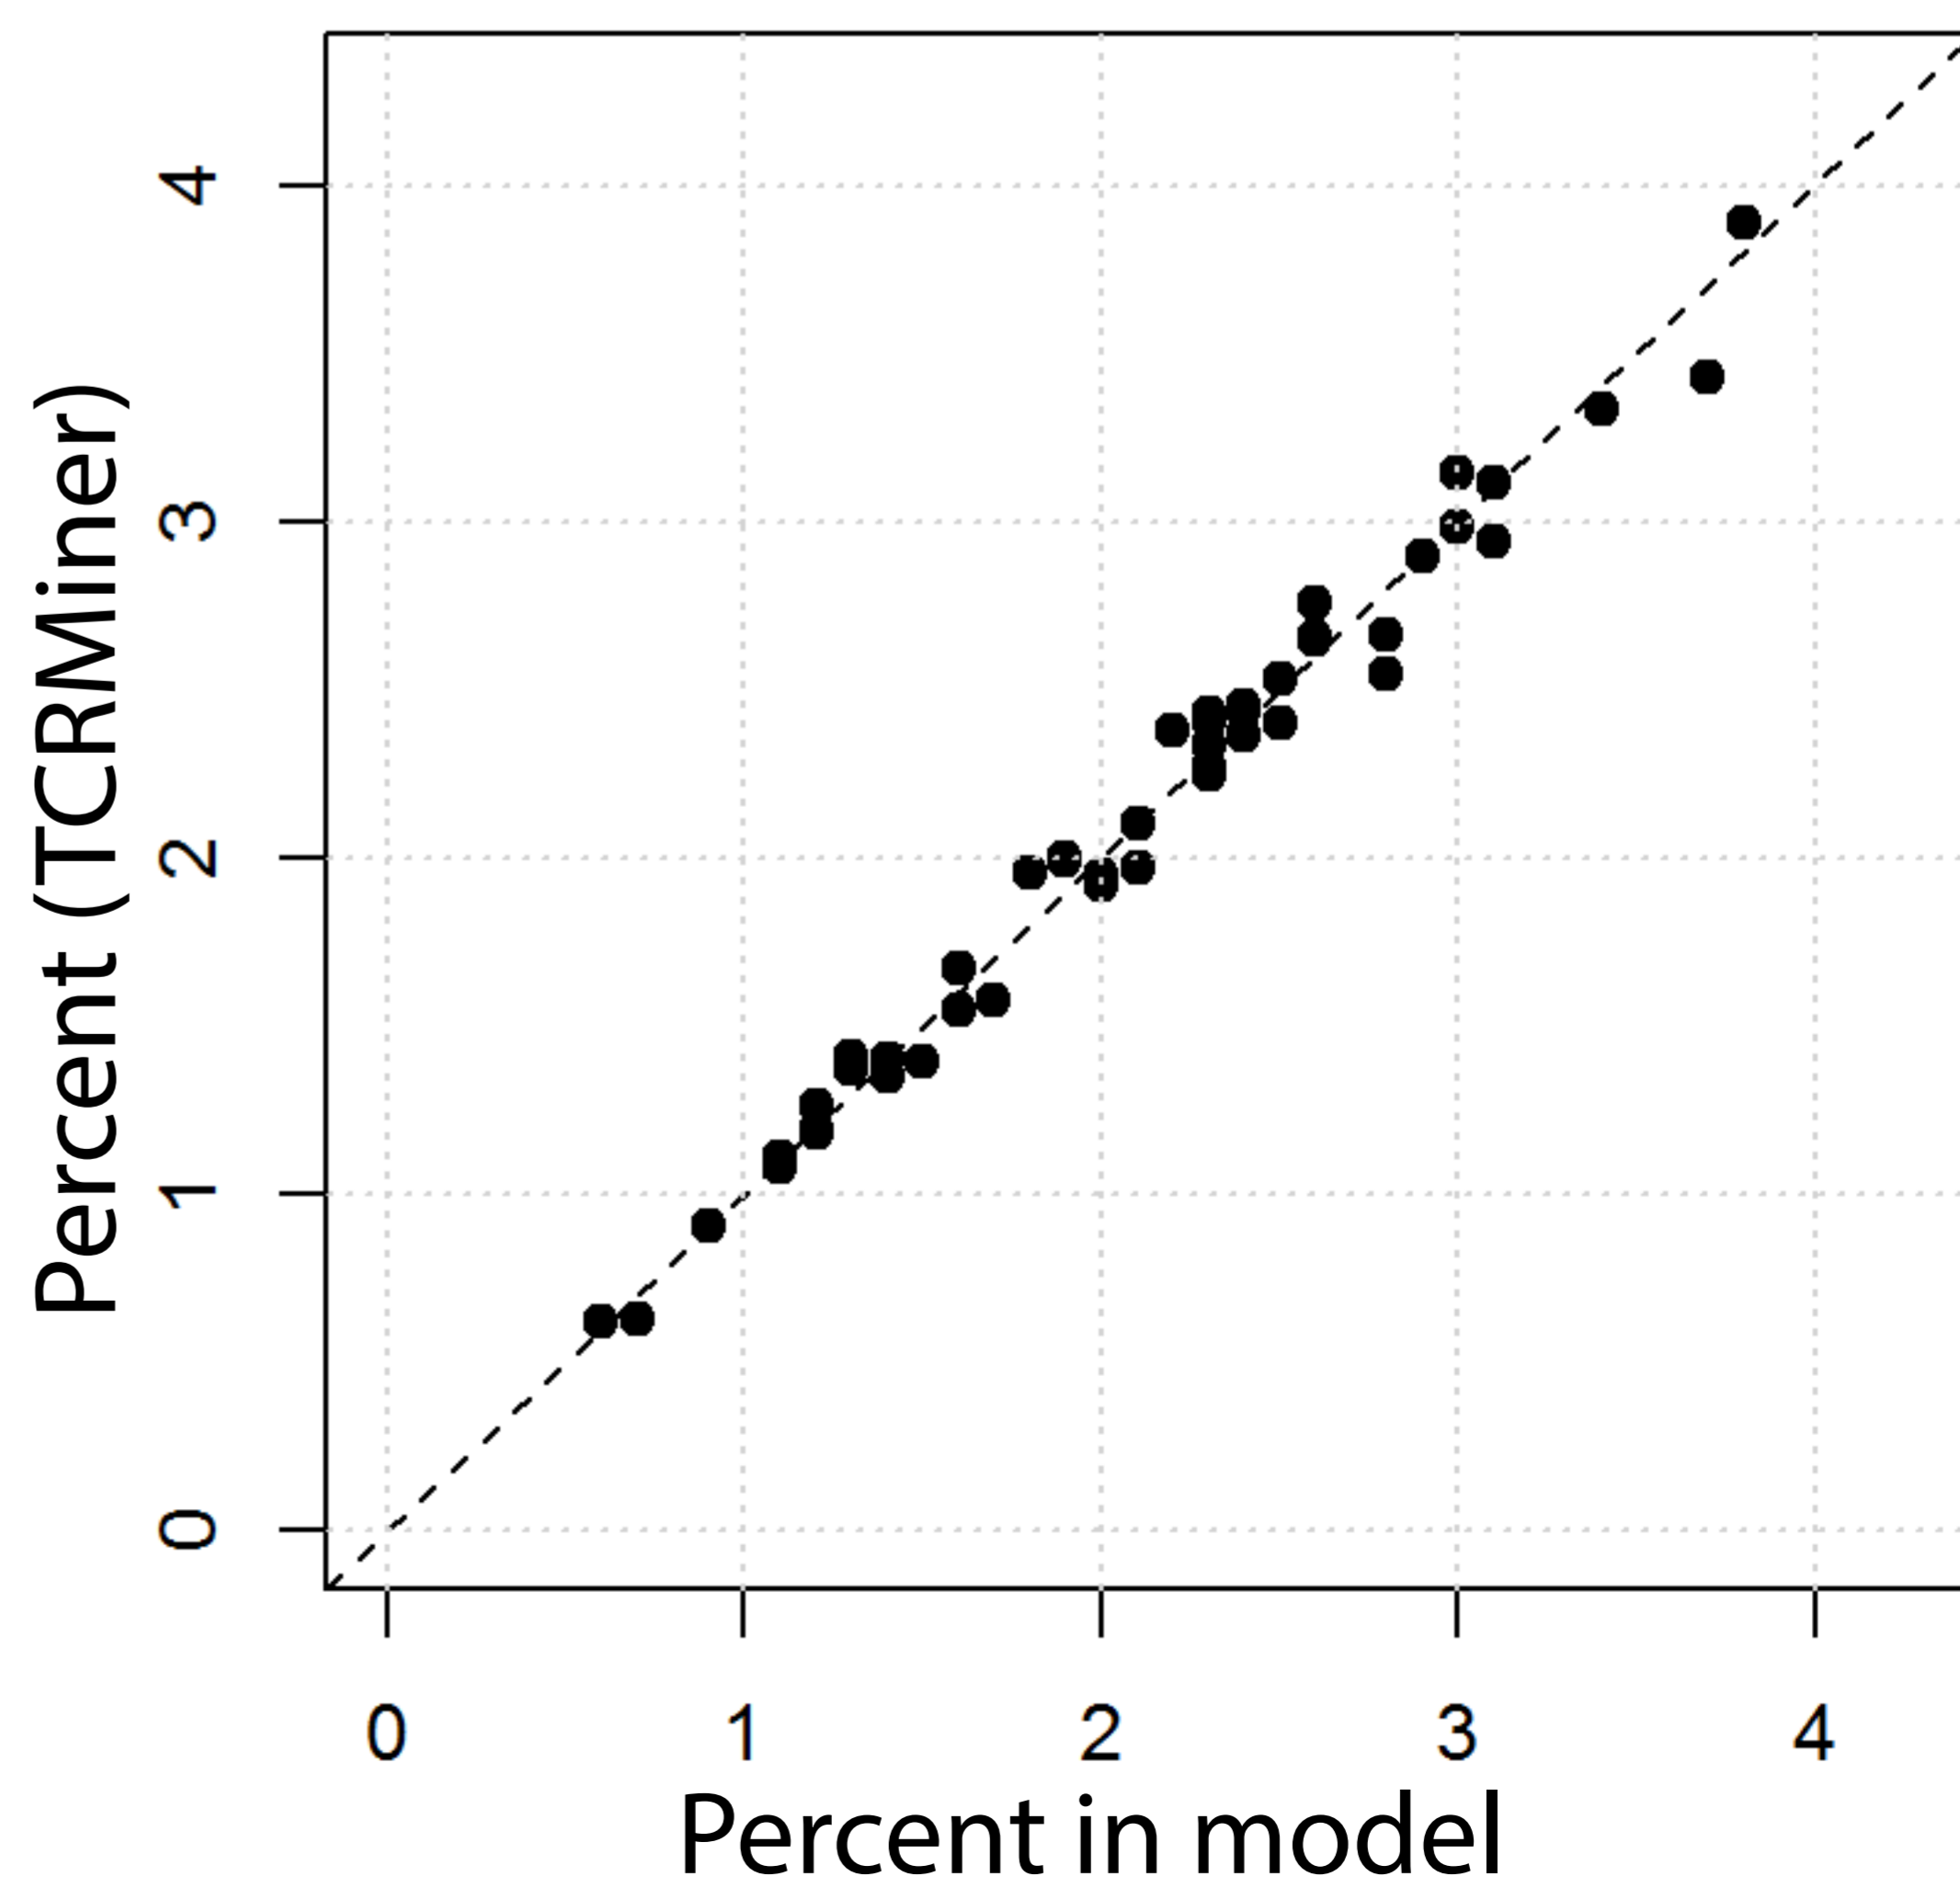

Simulate *in silico*  
TCR  $\alpha$ ,  $\beta$ ,  $\gamma$ , and  $\delta$   
chain rearrangements

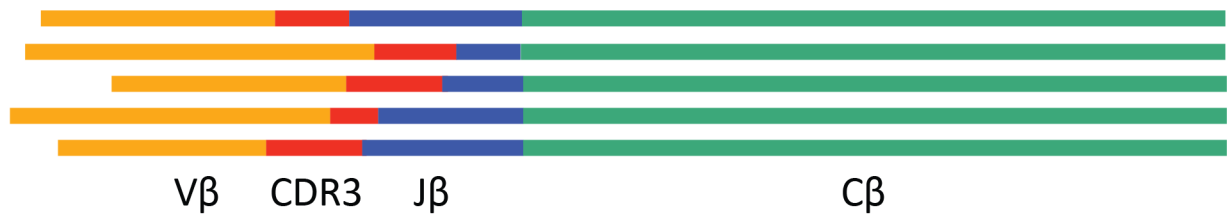

Build *in silico* sequencing  
library for RNA-Seq

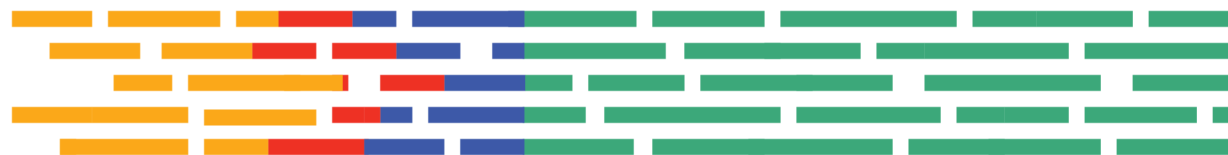

Produce *in silico*  
Illumina short reads

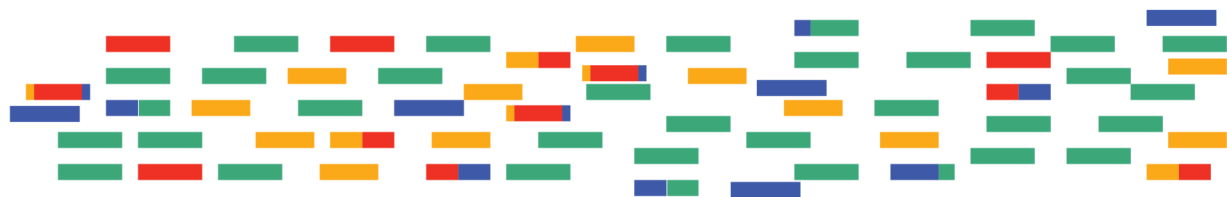

Align simulated reads  
to reference library

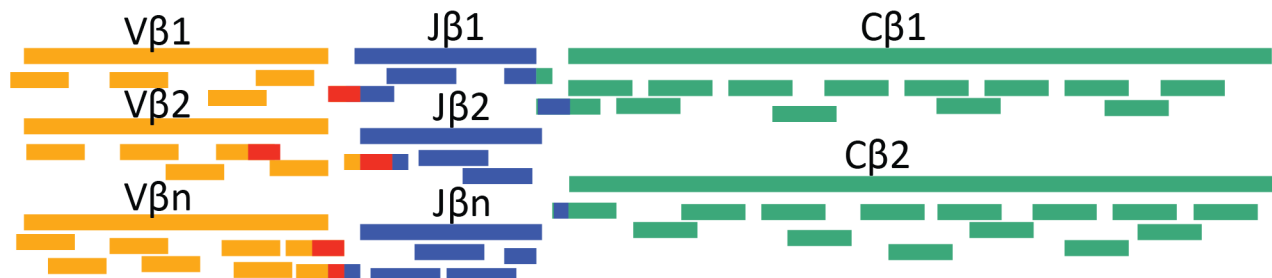

Compare TCR reads  
with original simulated  
TCR transcripts

| Chain | Simulated RNA-seq reads | MIXCR recovered | TCRminer recovered |
|-------|-------------------------|-----------------|--------------------|
| TRA   | 100000                  | 3028            | 99488              |
| TRB   | 100000                  | 4996            | 98739              |
| TRD   | 100000                  | 1759            | 99618              |
| TRG   | 100000                  | 5463            | 99331              |

Build *in silico* spectra  
(optional)

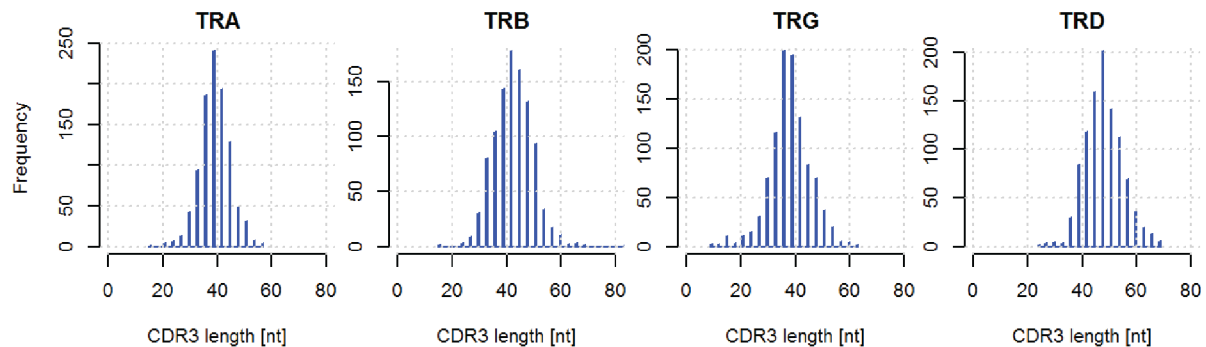

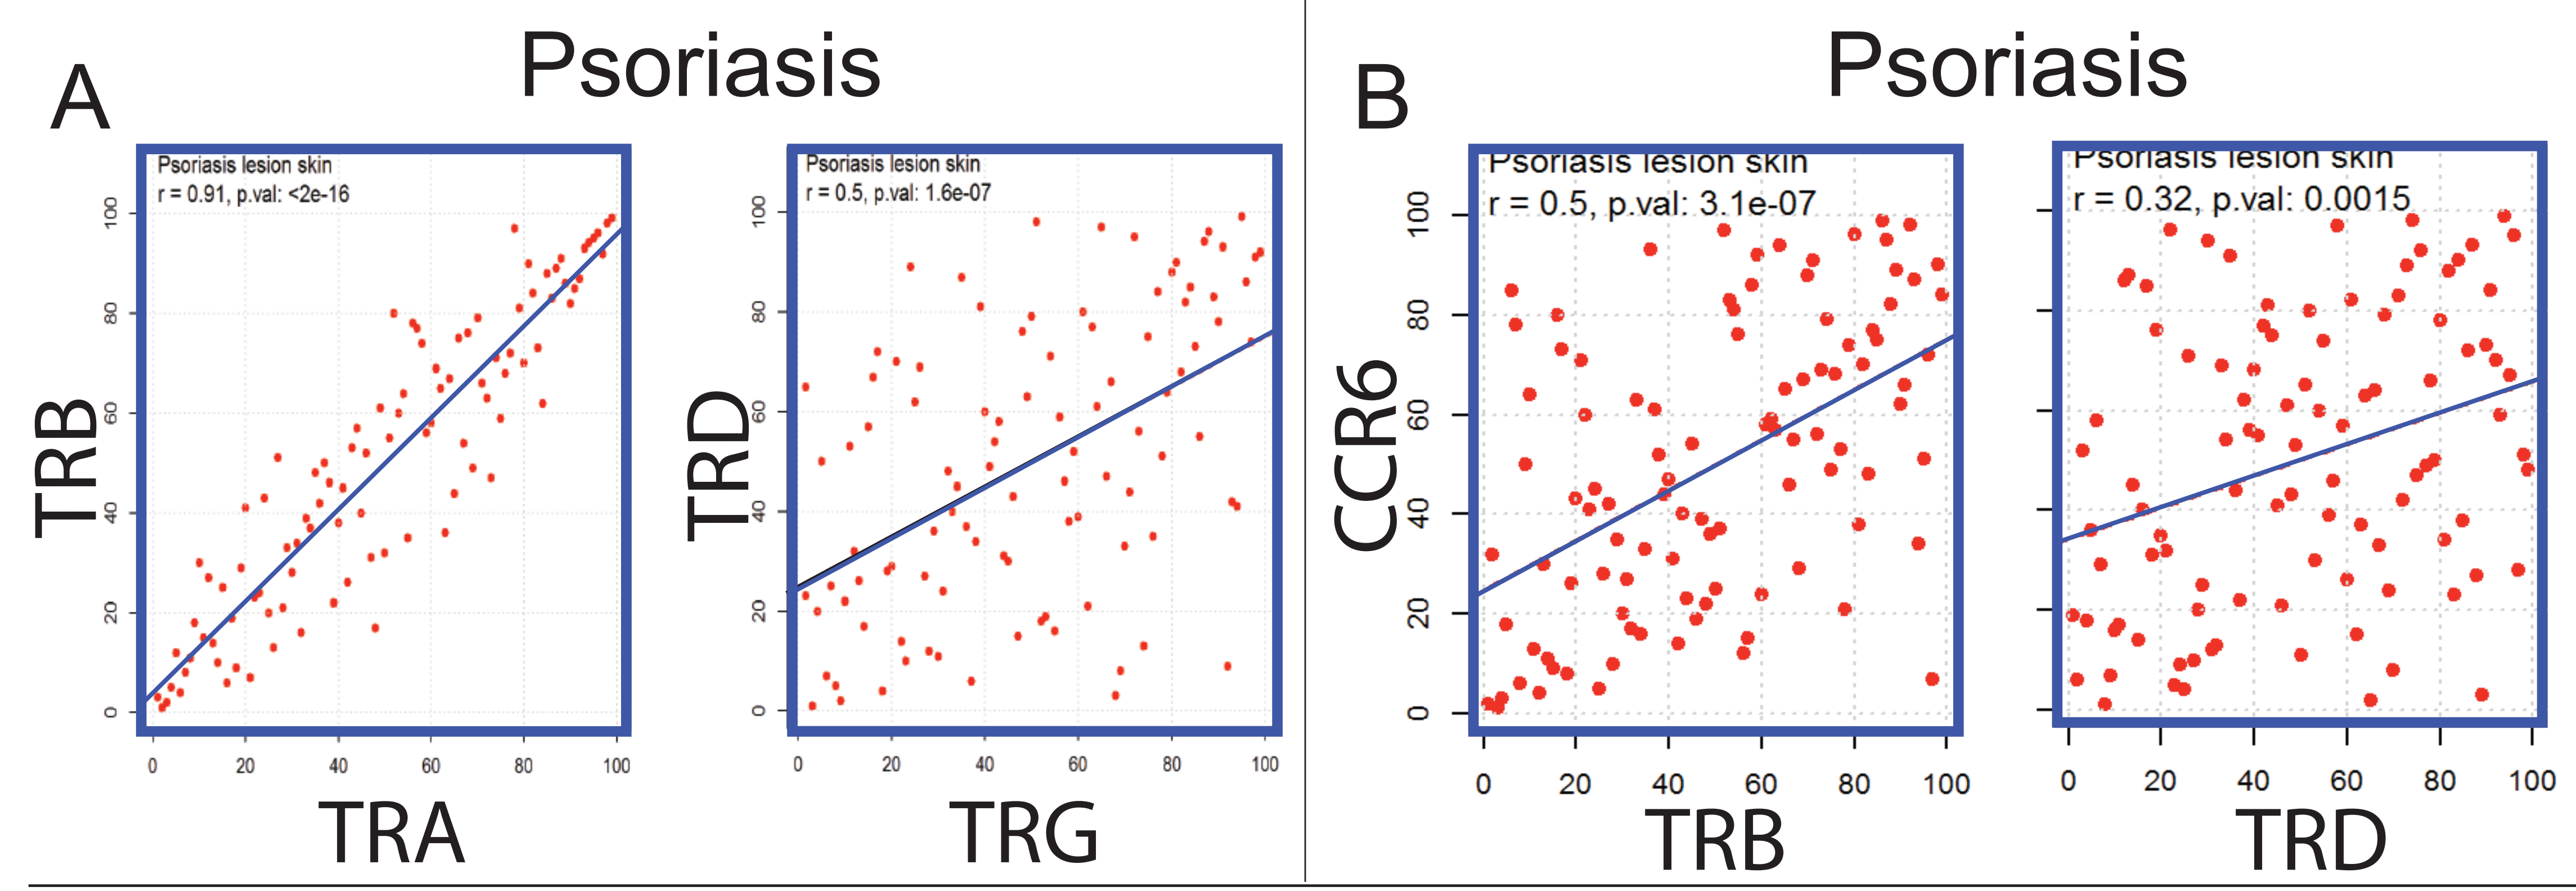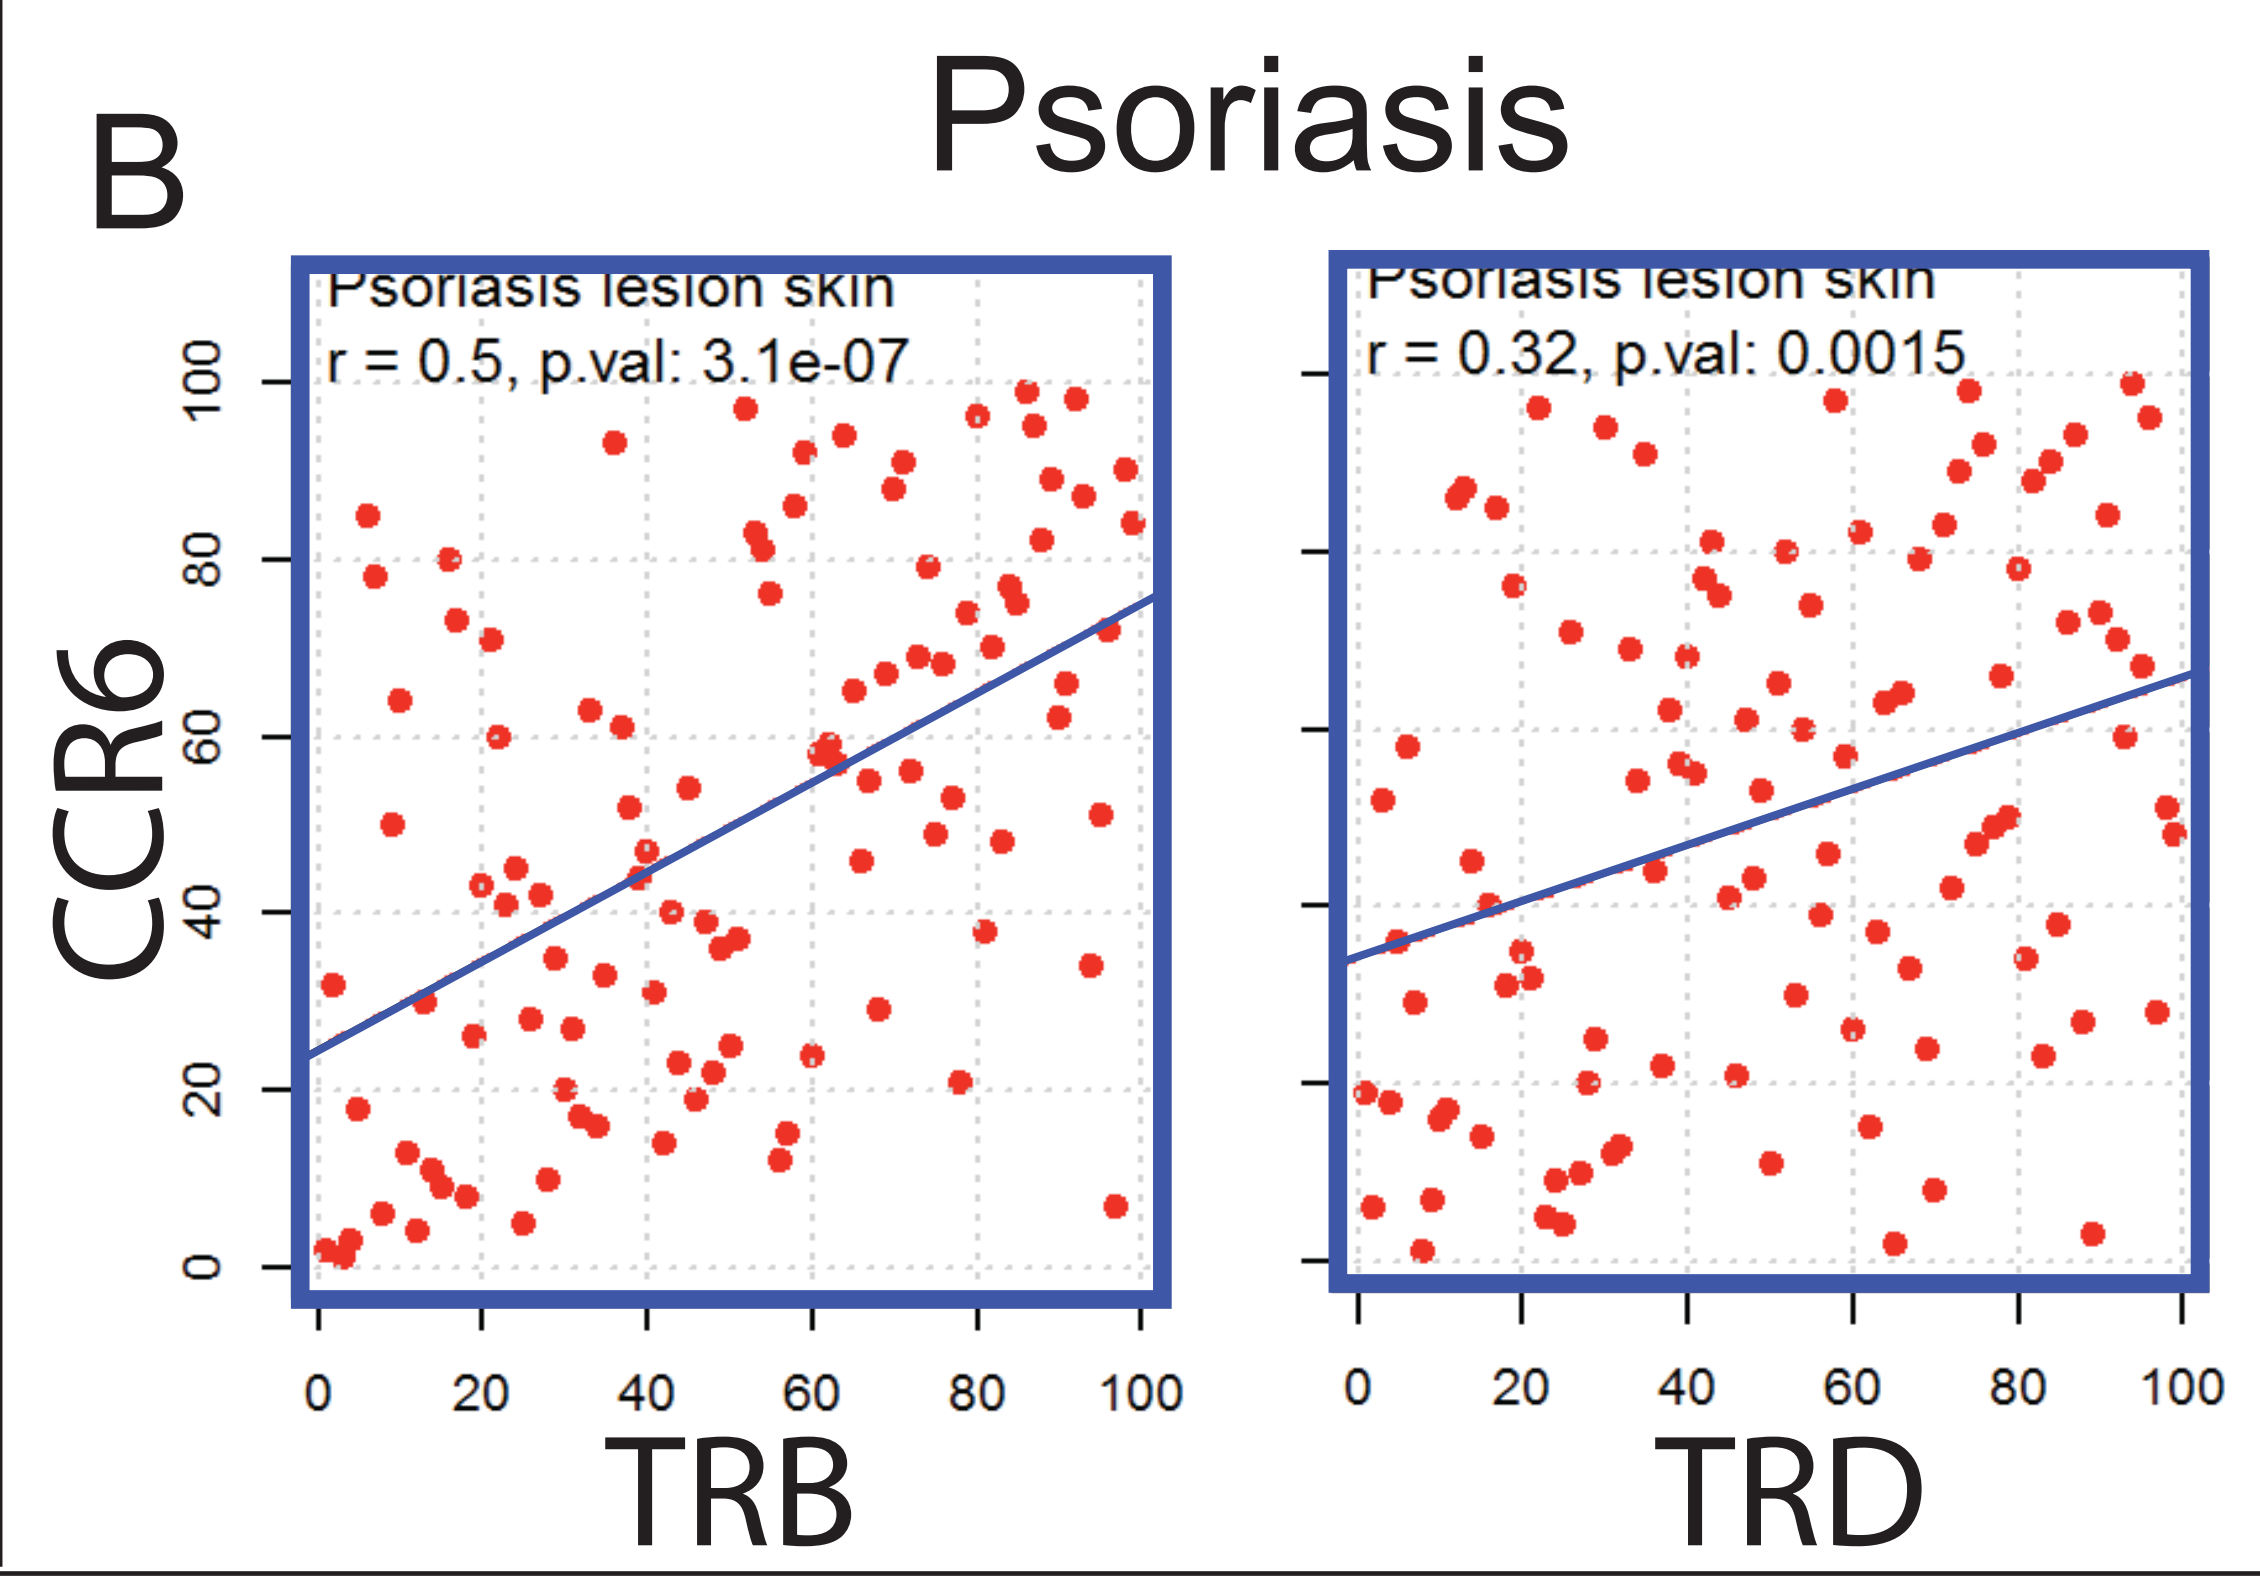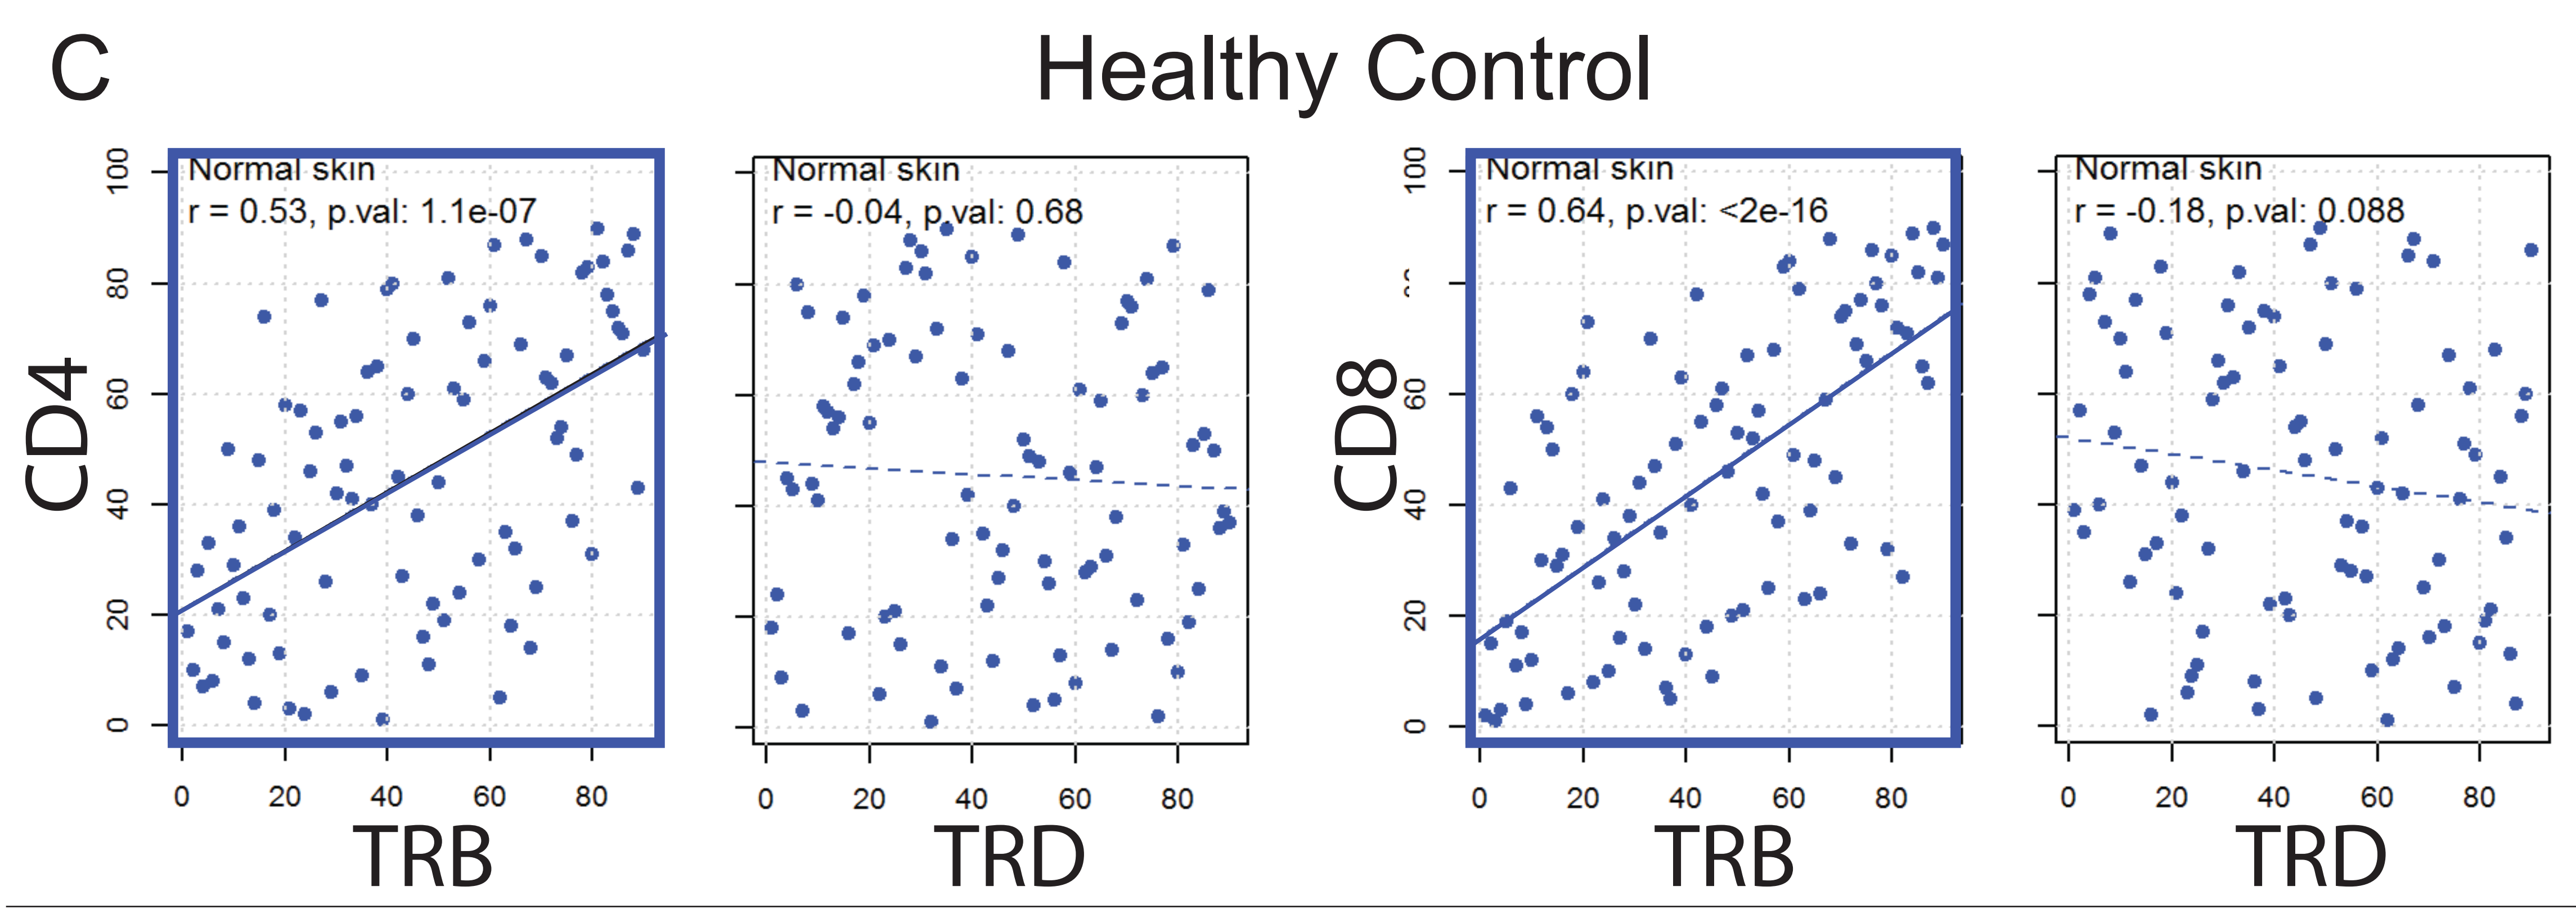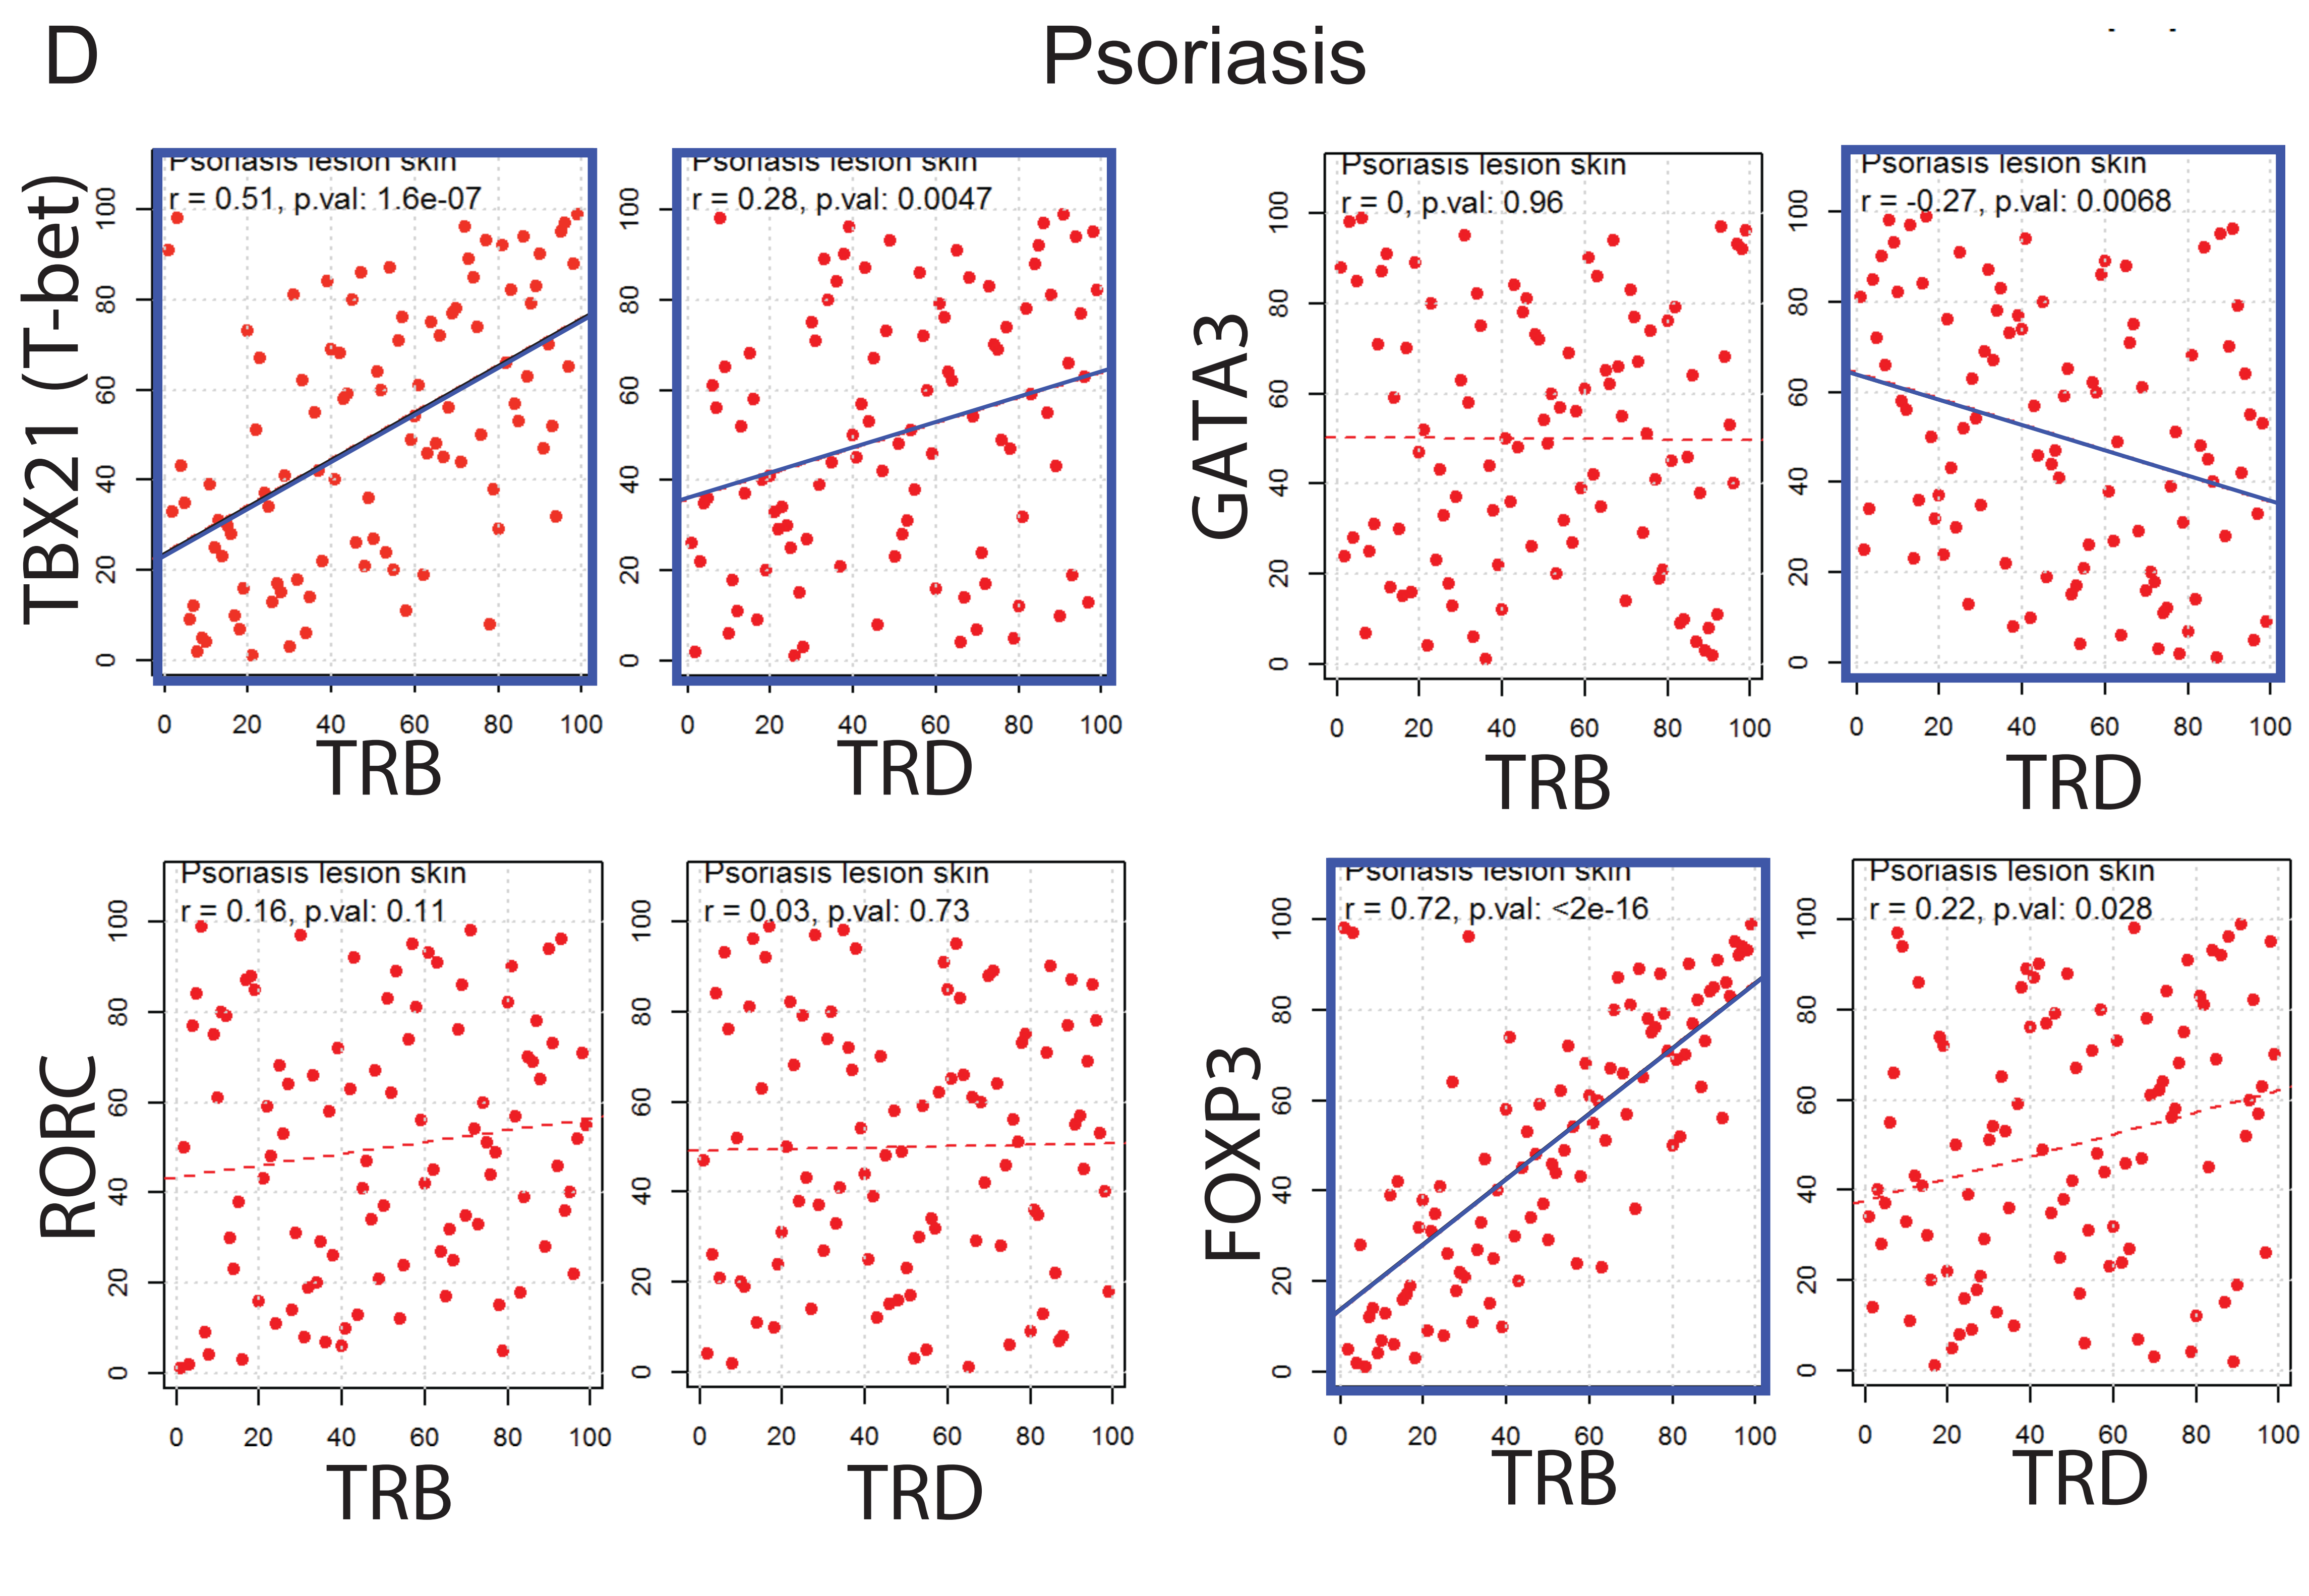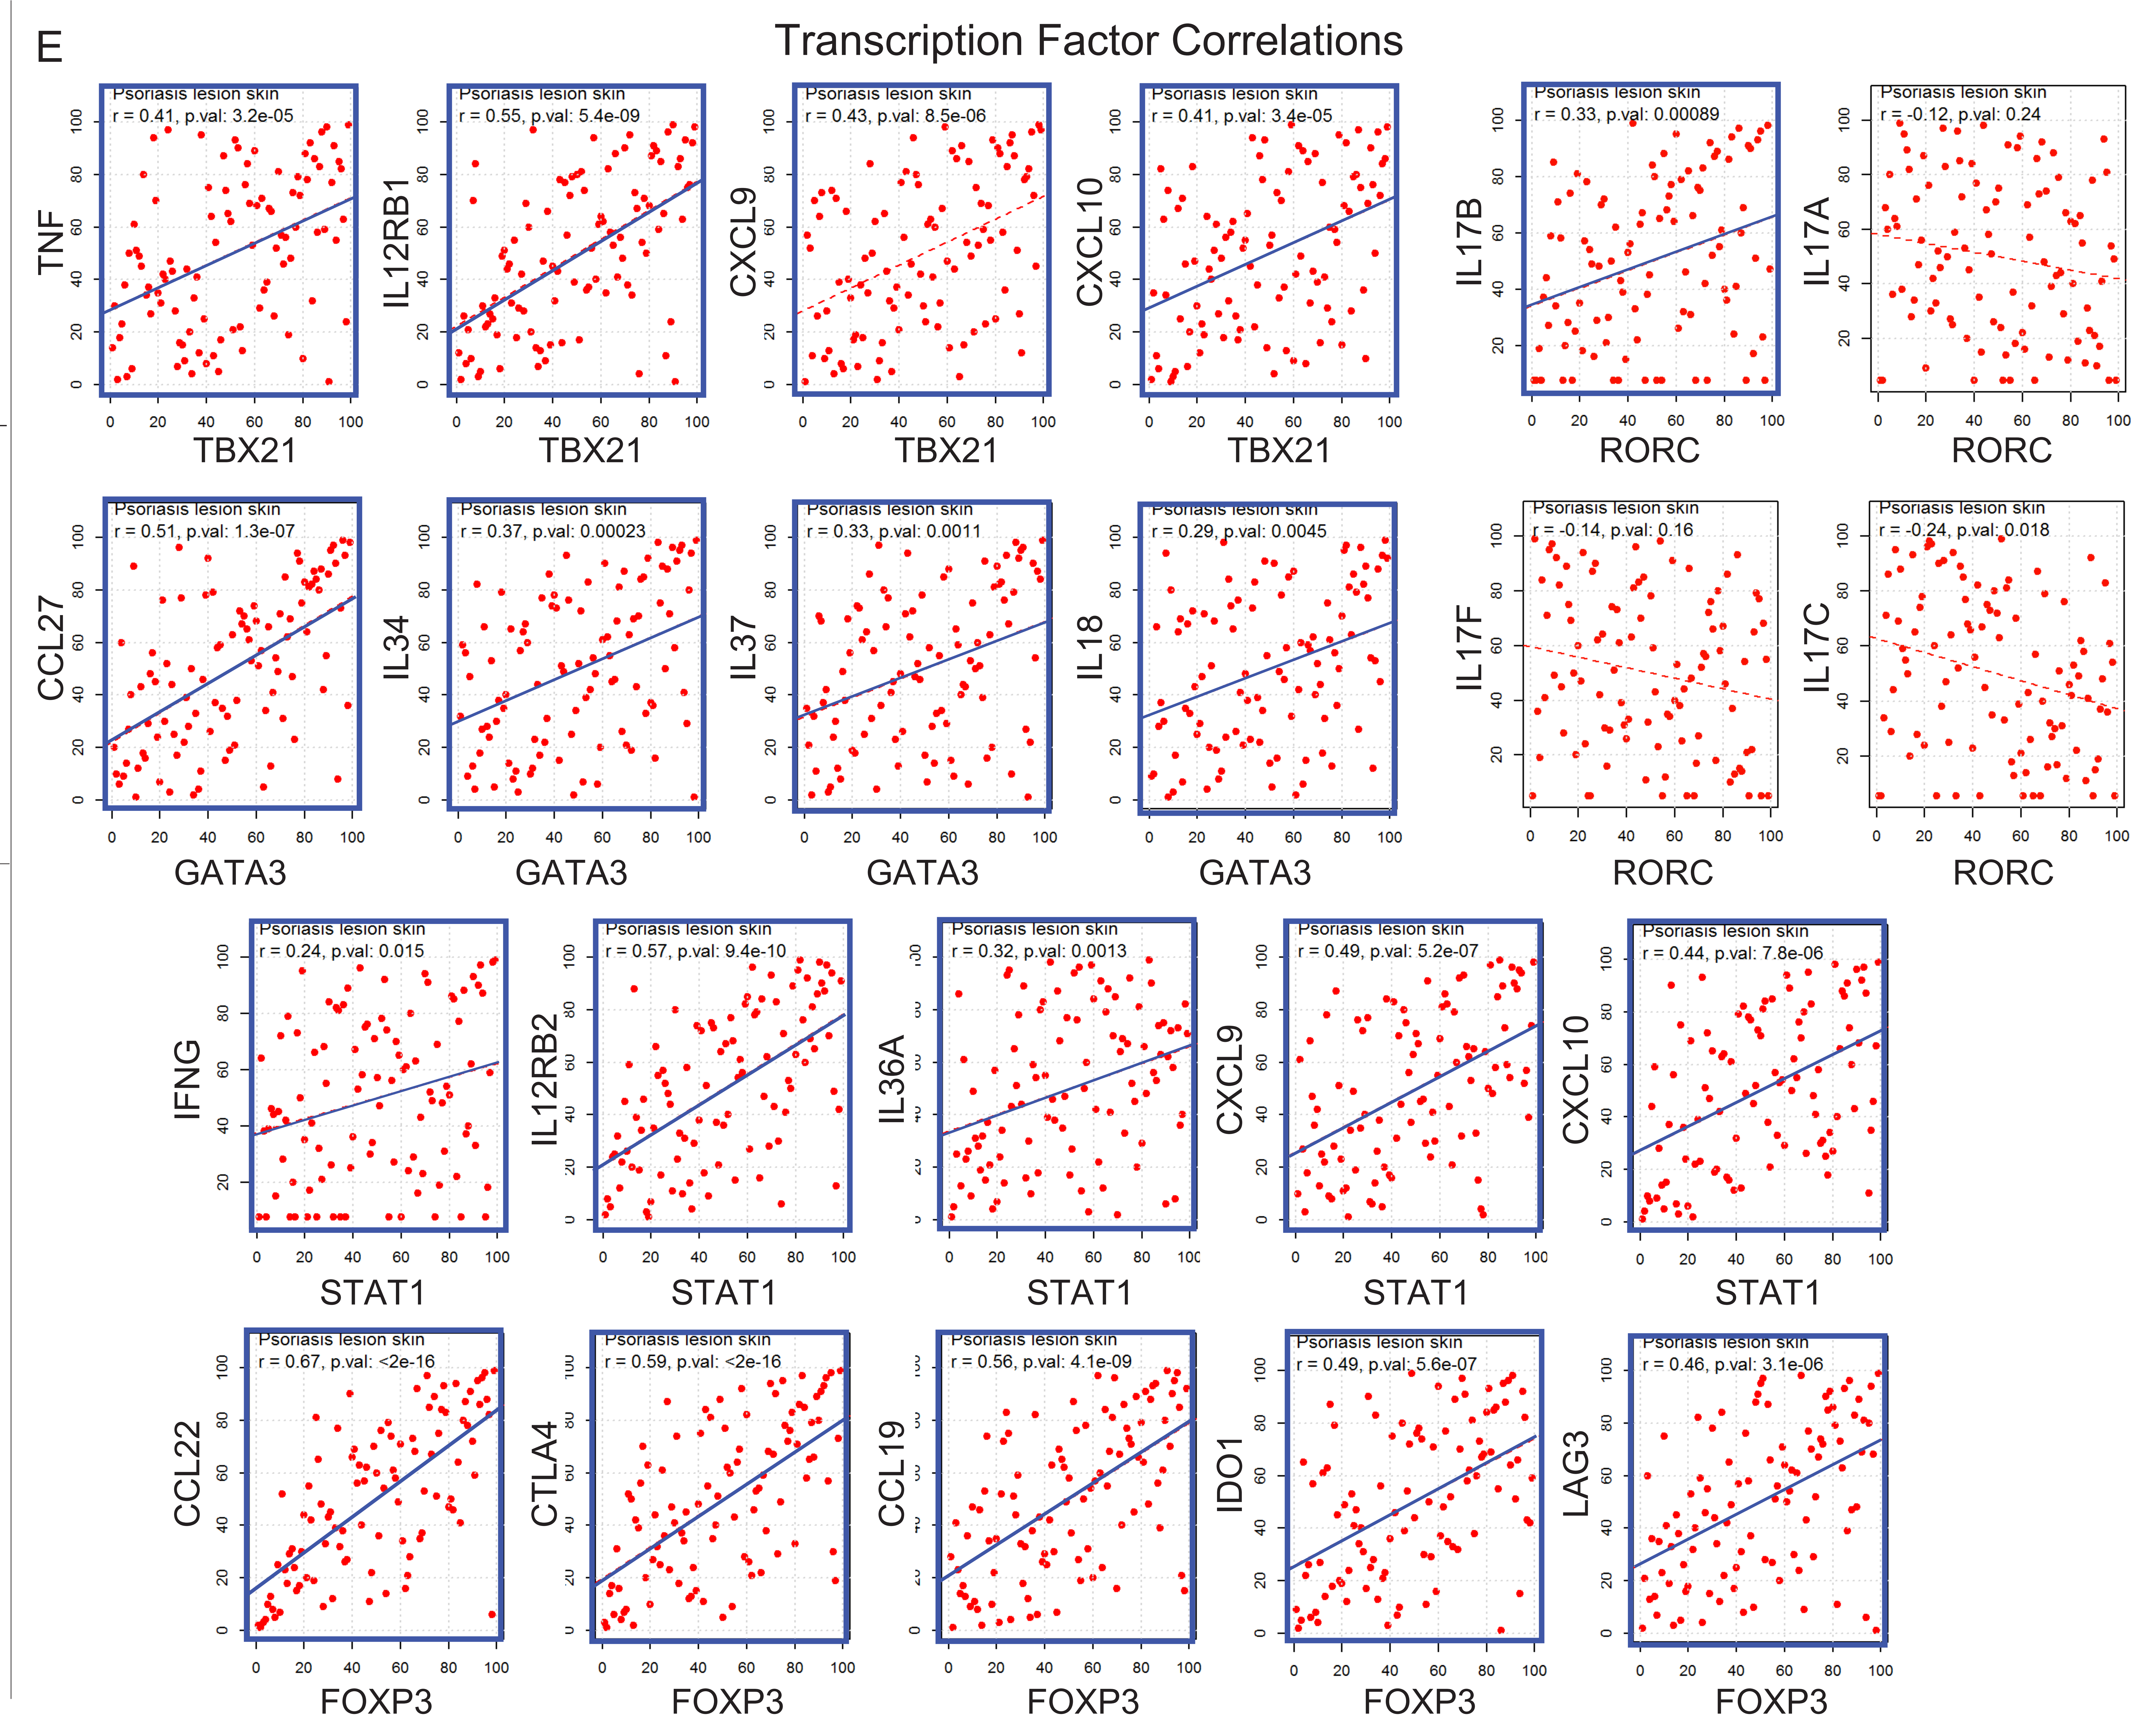

### TRGV5 - IL17C

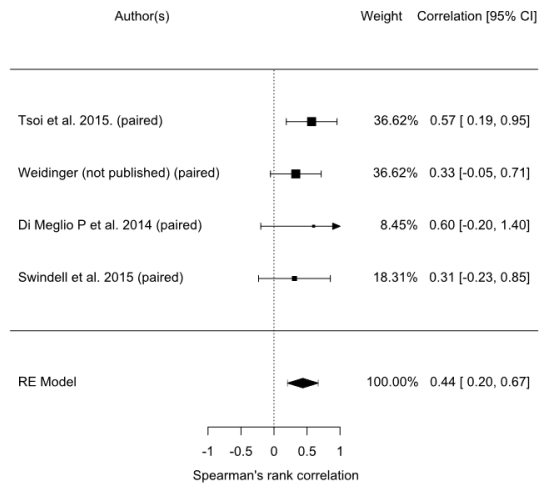

### TRAJ39 - IL17A

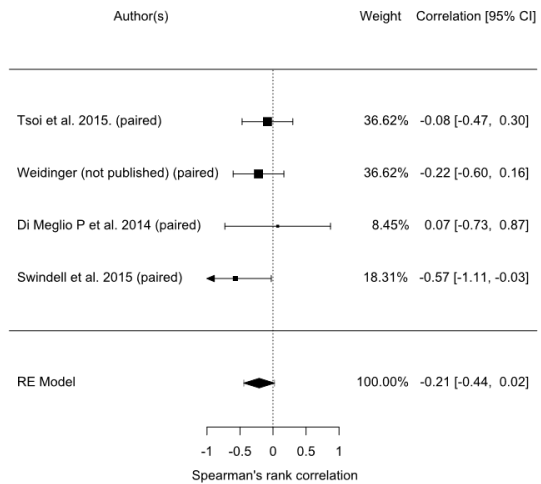

### TRBV3-1 - IL17A

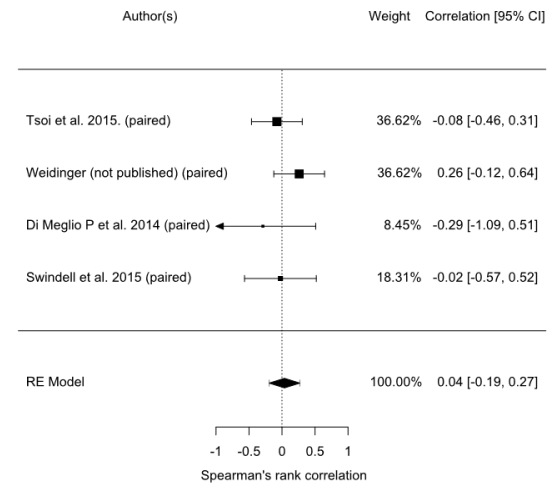

### TRAJ39 - IL36A

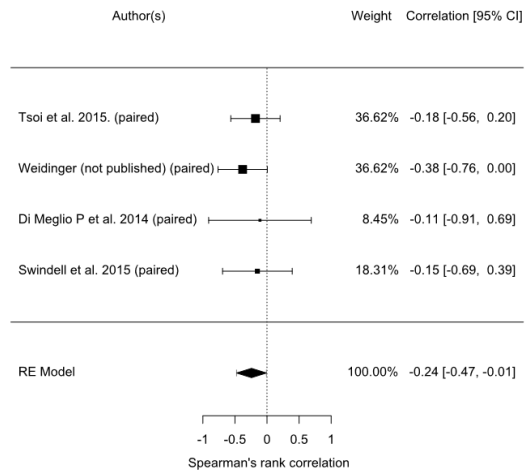

### TRBV3-1 - IL36A

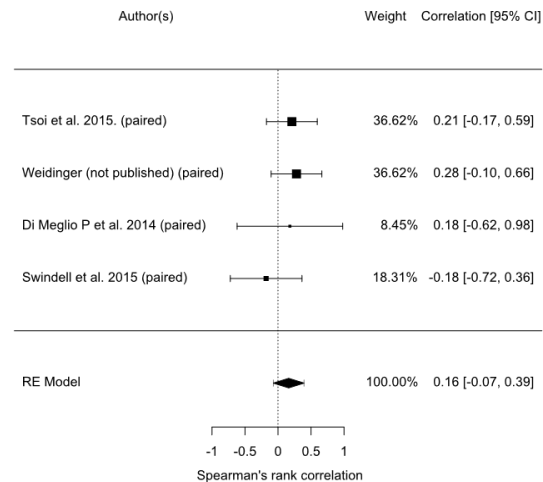

Supplementary Tables

**Table S1.** Benchmarking TCR extraction efficiency by rna-seq of cultured skin cells with no TCR

| <b>Extraction TCR rearranged clones with MIXCR - Human</b> |             |             |        |        |        |        |
|------------------------------------------------------------|-------------|-------------|--------|--------|--------|--------|
| Cell type                                                  | Sample      | Total reads | TRA    | TRB    | TRG    | TRD    |
| Fibroblast                                                 | ENCFF065GSV | 43710884    | 0      | 0      | 0      | 0      |
| Fibroblast                                                 | ENCFF509HFH | 23119342    | 0      | 0      | 0      | 0      |
| Fibroblast                                                 | ENCFF627NPY | 45481510    | 0      | 0      | 0      | 0      |
| Fibroblast                                                 | ENCFF737TKD | 22008878    | 0      | 0      | 0      | 0      |
| Keratinocyte                                               | ENCFF000IDC | 98244162    | 0      | 0      | 0      | 0      |
| Keratinocyte                                               | ENCFF000IDF | 108353593   | 0      | 0      | 0      | 0      |
| Keratinocyte                                               | SRR403879   | 68505523    | 0      | 0      | 0      | 0      |
| Keratinocyte                                               | SRR403880   | 79128508    | 0      | 0      | 0      | 0      |
| Keratinocyte                                               | SRR403881   | 79079729    | 0      | 0      | 0      | 0      |
| <b>Total per million RNA-Seq reads</b>                     |             |             | <0.001 | <0.001 | <0.001 | <0.001 |

  

| <b>Extraction TCR reads with TCRminer - Human</b> |             |             |     |     |      |        |
|---------------------------------------------------|-------------|-------------|-----|-----|------|--------|
| Cell type                                         | Sample      | Total reads | TRA | TRB | TRG  | TRD    |
| Fibroblast                                        | ENCFF065GSV | 43710884    | 7   | 6   | 7    | 0      |
| Fibroblast                                        | ENCFF509HFH | 23119342    | 3   | 3   | 1    | 0      |
| Fibroblast                                        | ENCFF627NPY | 45481510    | 7   | 5   | 4    | 0      |
| Fibroblast                                        | ENCFF737TKD | 22008878    | 2   | 2   | 3    | 0      |
| Keratinocyte                                      | ENCFF000IDC | 98244162    | 35  | 6   | 0    | 0      |
| Keratinocyte                                      | ENCFF000IDF | 108353593   | 69  | 5   | 0    | 0      |
| Keratinocyte                                      | SRR403879   | 68505523    | 12  | 40  | 0    | 0      |
| Keratinocyte                                      | SRR403880   | 79128508    | 30  | 9   | 0    | 0      |
| Keratinocyte                                      | SRR403881   | 79079729    | 5   | 11  | 0    | 0      |
| <b>Total per million RNA-Seq reads</b>            |             |             | 0.3 | 0.2 | 0.03 | <0.002 |

**Table S2.** Benchmarking TCR extraction efficiency using simulated data

| <b>MIXCR test with simulated TCR transcriptome</b> |      |      |      |      |
|----------------------------------------------------|------|------|------|------|
|                                                    | TRA  | TRB  | TRG  | TRD  |
| Simulated clones                                   | 1000 | 1000 | 1000 | 1000 |
| Found clones                                       | 1000 | 1000 | 998  | 1000 |
| Not uniquely or incorrect identified V-regions     | 0    | 0    | 0    | 0    |
| Not uniquely or incorrect identified J-regions     | 0    | 0    | 450  | 0    |
| CDR3 errors                                        | 0    | 0    | 0    | 0    |

  

| <b>TCRminer test with simulated TCR transcriptome</b> |      |      |      |      |
|-------------------------------------------------------|------|------|------|------|
|                                                       | TRA  | TRB  | TRG  | TRD  |
| Simulated clones                                      | 1000 | 1000 | 1000 | 1000 |
| Found TCR chains                                      | 1000 | 1000 | 1000 | 1000 |
| Found V-regions                                       | 1000 | 1000 | 1000 | 1000 |
| Found J-regions                                       | 992  | 986  | 963  | 988  |
| Not uniquely or incorrect identified V-regions        | 0    | 16   | 0    | 0    |
| Not uniquely or incorrect identified J-regions        | 0    | 0    | 259  | 0    |

**Table S3.** TCR recovery rate using simulated data

| Chain | Simulated RNA-Seq reads | MiXCR recovery rate | TCR miner recovery rate | MiXCR recovery percent | TCR miner recovery percent |
|-------|-------------------------|---------------------|-------------------------|------------------------|----------------------------|
| TRA   | 100000                  | 3028                | 99488                   | 3.03                   | 99.49                      |
| TRB   | 100000                  | 4996                | 98739                   | 5.00                   | 98.74                      |
| TRD   | 100000                  | 1759                | 99618                   | 1.76                   | 99.62                      |
| TRG   | 100000                  | 5463                | 99331                   | 5.46                   | 99.33                      |



**Table S4.** TCR V/J gene usage in the setting of psoriasis vs healthy controls in Tsoi et al. 2015 dataset.

| TCR Segment  | Normal   | Psoriasis | Segment Type |           | Fold Change | p-value   | FDR       | Bonferroni |
|--------------|----------|-----------|--------------|-----------|-------------|-----------|-----------|------------|
|              |          |           | Normal       | Psoriasis |             |           |           |            |
| TRAJ12       | 6.92e-03 | 1.41e-02  | 26           | 56        | 2.04        | 1.22e-04  | 1.24e-03  | 2.48e-02   |
| TRAJ23       | 2.69e-02 | 7.01e-02  | 55           | 89        | 2.60        | 3.03e-29  | 3.09e-27  | 6.19e-27   |
| TRAJ39       | 0.34     | 9.66e-02  | 90           | 88        | 0.29        | 7.02e-251 | 1.43e-248 | 1.43e-248  |
| TRAJ43       | 7.5e-03  | 1.5e-02   | 28           | 54        | 2.00        | 1.03e-04  | 1.23e-03  | 2.10e-02   |
| TRAJ44       | 9.61e-03 | 1.99e-02  | 32           | 63        | 2.07        | 2.61e-06  | 5.33e-05  | 5.33e-04   |
| TRB20/OR9-2  | 1.94e-03 | 5.45e-04  | 17           | 39        | 0.28        | 1.21e-04  | 1.24e-03  | 2.47e-02   |
| TRBV26/OR9-2 | 1.1e-02  | 2.84e-03  | 56           | 10        | 0.26        | 7.93e-22  | 5.39e-20  | 1.62e-19   |
| TRBV3-2      | 4.47e-03 | 1.27e-03  | 36           | 27        | 0.28        | 6.57e-09  | 1.91e-07  | 1.34e-06   |
| TRBV5-7      | 5.06e-04 | 7.27e-05  | 5            | 2         | 0.14        | 1.16e-02  | 4.14e-02  | 1.00       |
| TRBV5-8      | 1.18e-03 | 2.58e-03  | 13           | 38        | 2.19        | 6.08e-03  | 2.59e-02  | 1.00       |
| TRGV5        | 9.01e-02 | 0.17      | 60           | 77        | 1.88        | 2.96e-16  | 1.51e-13  | 6.03e-13   |
| TRGVA        | 1.88e-02 | 1.88e-03  | 20           | 6         | 0.10        | 3.12e-10  | 1.09e-08  | 6.37e-08   |

**Table S5.** Unpaired analysis of TCR V/J gene usage for lesional versus non-lesional samples in Tsoi et al. 2015 dataset.

| TCR Segment  | Segment Type |           | Sample Number |           | Fold Change | p-value | FDR  | Bonferroni |          |          |
|--------------|--------------|-----------|---------------|-----------|-------------|---------|------|------------|----------|----------|
|              | Normal       | Psoriasis | Normal        | Psoriasis |             |         |      |            |          |          |
| TRAJ13       | 20           | 64        | 1751          | 2772      | 15          | 23      | 2.02 | 4.50e-03   | 3.12e-02 | 8.73e-01 |
| TRAJ23       | 41           | 198       | 1751          | 2772      | 19          | 27      | 3.05 | 1.81e-13   | 1.75e-11 | 3.51e-11 |
| TRAJ32       | 22           | 71        | 1751          | 2772      | 14          | 22      | 2.04 | 2.45e-03   | 1.98e-02 | 4.75e-01 |
| TRAJ34       | 15           | 52        | 1751          | 2772      | 10          | 20      | 2.19 | 5.25e-03   | 3.51e-02 | 1.00e+00 |
| TRAJ39       | 525          | 260       | 1751          | 2772      | 27          | 26      | 0.31 | 3.23e-69   | 6.26e-67 | 6.26e-67 |
| TRAJ42       | 23           | 78        | 1751          | 2772      | 14          | 22      | 2.14 | 8.57e-04   | 1.04e-02 | 1.66e-01 |
| TRAJ5        | 23           | 81        | 1751          | 2772      | 13          | 26      | 2.22 | 3.32e-04   | 4.30e-03 | 6.45e-02 |
| TRBV26/OR9-2 | 52           | 32        | 4405          | 9741      | 19          | 14      | 0.28 | 7.65e-09   | 3.71e-07 | 1.48e-06 |
| TRBV29/OR9-2 | 54           | 56        | 4405          | 9741      | 17          | 21      | 0.47 | 1.08e-04   | 1.49e-03 | 2.09e-02 |
| TRBV3-1      | 33           | 180       | 4405          | 9741      | 16          | 27      | 2.47 | 1.97e-07   | 7.63e-06 | 3.82e-05 |
| TRBV3-2      | 21           | 10        | 4405          | 9741      | 13          | 9       | 0.22 | 3.91e-05   | 6.32e-04 | 7.59e-03 |
| TRBV5-5      | 48           | 47        | 4405          | 9741      | 13          | 16      | 0.44 | 8.29e-05   | 1.24e-04 | 1.61e-02 |
| TRGV5        | 53           | 193       | 567           | 1079      | 20          | 23      | 1.91 | 2.82e-06   | 5.46e-05 | 5.46e-04 |
| TRGVA        | 8            | 2         | 567           | 1079      | 7           | 2       | 0.13 | 4.20e-03   | 3.02e-02 | 8.15e-01 |

**Table S6.** TCR V/J gene usage in the setting of psoriasis vs healthy controls in Weidinger dataset

| TCR Segment  | Normal | Psoriasis | Segment Type |           | Sample Number |           | Fold Change | p-value  | FDR      | Bonferroni |
|--------------|--------|-----------|--------------|-----------|---------------|-----------|-------------|----------|----------|------------|
|              |        |           | Normal       | Psoriasis | Normal        | Psoriasis |             |          |          |            |
| TRAJ22       | 39     | 95        | 2005         | 2334      | 18            | 23        | 2.09        | 4.60e-05 | 1.05e-03 | 9.47e-03   |
| TRAJ23       | 57     | 221       | 2005         | 2334      | 23            | 23        | 3.33        | 5.15e-20 | 5.30e-18 | 1.06e-17   |
| TRAJ39       | 332    | 75        | 2005         | 2334      | 37            | 23        | 0.19        | 1.92e-53 | 3.96e-51 | 3.96e-51   |
| TRAJ9        | 18     | 48        | 2005         | 2334      | 12            | 14        | 2.29        | 1.76e-03 | 2.42e-02 | 3.63e-01   |
| TRAV12-2     | 17     | 143       | 794          | 2346      | 10            | 23        | 2.85        | 3.58e-06 | 1.23e-04 | 7.37e-04   |
| TRBV12-4     | 6      | 56        | 1363         | 3212      | 6             | 20        | 3.96        | 2.17e-04 | 3.86e-03 | 4.47e-02   |
| TRBV20/OR9-2 | 6      | 1         | 1363         | 3212      | 5             | 1         | 0.07        | 3.62e-03 | 4.39e-02 | 7.46e-01   |
| TRBV26/OR9-2 | 24     | 17        | 1363         | 3212      | 12            | 6         | 0.30        | 1.94e-04 | 3.86e-03 | 3.99e-02   |
| TRBV3-2      | 44     | 19        | 1363         | 3212      | 19            | 10        | 0.18        | 4.67e-11 | 3.21e-09 | 9.63e-09   |
| TRBV30       | 48     | 39        | 1363         | 3212      | 26            | 16        | 0.34        | 6.85e-07 | 2.82e-05 | 1.41e-04   |
| TRBV5-3      | 5      | 0         | 1363         | 3212      | 3             | 0         | 0.00        | 2.33e-03 | 3.01e-02 | 4.81e-01   |
| TRBV7-9      | 24     | 175       | 1363         | 3212      | 14            | 23        | 3.09        | 2.54e-09 | 1.31e-07 | 5.23e-07   |
| TRDV3        | 18     | 5         | 74           | 101       | 11            | 5         | 0.20        | 2.25e-04 | 3.86e-03 | 4.63e-02   |
| TRGV5        | 14     | 89        | 332          | 709       | 9             | 18        | 2.98        | 1.10e-05 | 3.24e-04 | 2.27e-03   |
| TRGVA        | 6      | 7         | 332          | 709       | 5             | 3         | 0.55        | 3.68e-01 | 7.02e-01 | 1.00e+00   |

**Table S7.** Association between HLA-C\*06 and TCR V- J- gene usage in psoriasis in Tsoi et al. 2015 dataset.

| TCR Segment      | Other HLA | HLA-C06  | Sample Number |         | Fold change | p-value  | FDR      | Bonferroni |
|------------------|-----------|----------|---------------|---------|-------------|----------|----------|------------|
|                  |           |          | Other HLA     | HLA-C06 |             |          |          |            |
| TRAJ40           | 2.36e-02  | 8.90e-03 | 33            | 24      | 0.41        | 4.99e-06 | 6.62e-04 | 1.02e-03   |
| TRBV26/<br>OR9-2 | 2.07e-03  | 3.79e-03 | 14            | 24      | 2.10        | 1.88e-03 | 3.03e-02 | 3.83e-01   |

**Table S8.** Association between HLA-C\*06 and TCR V- J- gene usage in healthy individuals in Tsoi et al. 2015 dataset.

| TCR Segment | Other HLA | HLA-C06  | Sample Number |         | Fold change | p-value  | FDR      | Bonferroni |
|-------------|-----------|----------|---------------|---------|-------------|----------|----------|------------|
|             |           |          | Other HLA     | HLA-C06 |             |          |          |            |
| TRAV38-1    | 3.33e-02  | 9.56e-03 | 37            | 16      | 2.04        | 2.32e-05 | 1.58e-03 | 4.74e-03   |
| TRBV15-2    | 4.53e-02  | 7.71e-03 | 50            | 13      | 0.44        | 4.83e-05 | 1.97e-03 | 9.85e-03   |
| TRAJ3       | 5.36e-02  | 1.59e-03 | 37            | 5       | 0.24        | 1.04e-04 | 3.52e-03 | 2.11e-02   |
| TRAJ33      | 2.69e-02  | 8.16e-03 | 24            | 9       | 2.55        | 1.83e-04 | 5.05e-03 | 3.74e-02   |
| TRBV23-1    | 9.89e-03  | 3.77e-03 | 20            | 5       | 2.61        | 1.98e-04 | 5.05e-03 | 4.04e-02   |
| TRBV14      | 3.23e-02  | 2.14e-03 | 39            | 10      | 0.45        | 7.64e-04 | 1.42e-02 | 1.56e-01   |
| TRBV24      | 4.33e-02  | 3.00e-03 | 39            | 12      | 0.48        | 1.45e-03 | 2.46e-02 | 2.95e-01   |

**Table S9.** T cell clones that were discovered in multiple psoriatic plaques or control biopsies

| Chain | AA. Seq. CDR3      | Normal skin samples | Psoriasis lesional skin samples |
|-------|--------------------|---------------------|---------------------------------|
| TRA   | CAVNDYKLSF         | 1                   | 4                               |
| TRA   | CAVMDSYKLIF        | 0                   | 3                               |
| TRA   | CAAMDSSYKLIF       | 0                   | 2                               |
| TRA   | CALDAGNNRKLIV      | 0                   | 2                               |
| TRA   | CALDSGGYQKVTF      | 0                   | 2                               |
| TRA   | CALNTDKLIF         | 1                   | 1                               |
| TRA   | CALYSGGGADGLTF     | 0                   | 2                               |
| TRA   | CAVNGNARLMF        | 0                   | 2                               |
| TRA   | CAVNRDDKIIF        | 0                   | 2                               |
| TRA   | CAVQGSQGNLIF       | 2                   | 0                               |
| TRA   | CAVRDGDYKLSF       | 1                   | 1                               |
| TRA   | CAVRRMDSSYKLIF     | 0                   | 2                               |
| TRA   | CAVSGTGRRALTF      | 0                   | 2                               |
| TRA   | CAVSNQAGTALIF      | 0                   | 2                               |
| TRA   | CAVYSGAGSYQLTF     | 0                   | 2                               |
| TRA   | CLVGYNTDKLIF       | 1                   | 1                               |
| TRB   | CASSDSSGSYNEQFF    | 2                   | 0                               |
| TRB   | CASSTINSPLHF       | 1                   | 1                               |
| TRB   | CATSRDSNTGVGNQPQHF | 0                   | 2                               |
| TRG   | CATWD_DKKLF        | 1                   | 1                               |

**Table S10.** The Shannon Diversity Index for healthy and psoriatic CDR3 sequences

| Chain | Healthy Control | Psoriasis  | p-value  |
|-------|-----------------|------------|----------|
| TRA   | 1.6 +- 0.07     | 2.1 +- 0.1 | 1.34e-07 |
| TRB   | 1.6 +- 0.08     | 2.2 +- 0.1 | 3.70e-08 |

**Table S11.** The Shannon Diversity Index for healthy and psoriatic V/J sequences

| Chain | Healthy Control | Psoriasis   | p-value  |
|-------|-----------------|-------------|----------|
| TRA   | 3.5 +- 0.04     | 3.8 +- 0.05 | 1.14e-14 |
| TRB   | 3.2 +- 0.03     | 3.4 +- 0.04 | 2.57e-08 |
| TRG   | 1.6 +- 0.04     | 1.7 +- 0.5  | 1.31e-01 |
| TRD   | 0.79+- 0.05     | 0.91 +- 0.5 | 9.41e-02 |

**Table S12.** TCR gene segments correlation with T cell markers

| TCRminer |       |           |      |           |       |           |       |           |
|----------|-------|-----------|------|-----------|-------|-----------|-------|-----------|
| Gene     | TRA   | TRA p-val | TRB  | TRB p-val | TRG   | TRG p-val | TRD   | TRD p-val |
| CD4      | 0.58  | 3.6e-10   | 0.61 | <2e-16    | 0.41  | 2.9e-05   | 0.47  | 1.5e-06   |
| CD8A     | 0.64  | <2e-16    | 0.67 | <2e-16    | 0.5   | 1.8e-07   | 0.22  | 0.027     |
| GATA3    | -0.04 | 0.69      | 0    | 0.97      | -0.13 | 0.19      | -0.27 | 0.007     |
| TBX21    | 0.49  | 5.5e-07   | 0.51 | 1.6e-07   | 0.42  | 1.7e-05   | 0.28  | 0.0047    |
| RORC     | 0.04  | 0.67      | 0.16 | 0.11      | -0.02 | 0.86      | 0.03  | 0.73      |

  

| MIXCR |            |                  |            |                  |            |                  |            |                  |
|-------|------------|------------------|------------|------------------|------------|------------------|------------|------------------|
| Gene  | TRA clones | TRA clones p-val | TRB clones | TRB clones p-val | TRG clones | TRG clones p-val | TRD clones | TRD clones p-val |
| CD4   | 0.56       | 2.9e-09          | 0.53       | 1.5e-08          | 0.33       | 0.00098          | NA         | NA               |
| CD8A  | 0.45       | 2.7e-06          | 0.26       | 0.01             | 0.22       | 0.035            | NA         | NA               |
| GATA3 | -0.02      | 0.84             | 0.11       | 0.3              | 0.16       | 0.11             | NA         | NA               |
| TBX21 | 0.44       | 4.4e-06          | 0.28       | 0.0043           | 0.15       | 0.15             | NA         | NA               |
| RORC  | 0.07       | 0.48             | 0.08       | 0.45             | 0.11       | 0.29             | NA         | NA               |

**Table S13.** TCRminer correlation with psoriasis-related genes

| Gene      | TRA   | TRA<br>p-val | TRB   | TRB<br>p-val | TRG   | TRG<br>p-val | TRD   | TRD<br>p-val |
|-----------|-------|--------------|-------|--------------|-------|--------------|-------|--------------|
| IFNG      | 0.23  | 0.021        | 0.19  | 0.057        | 0.2   | 0.05         | 0.12  | 0.24         |
| IL1A      | -0.09 | 0.4          | -0.11 | 0.29         | 0.02  | 0.86         | 0.05  | 0.65         |
| IL1B      | 0.13  | 0.22         | 0.14  | .17          | 0.2   | 0.044        | 0.15  | 0.15         |
| IL6       | 0.05  | 0.61         | 0.03  | 0.76         | 0.08  | 0.46         | 0.23  | 0.024        |
| IL6R      | 0.28  | 0.0048       | 0.3   | 0.0027       | 0.2   | 0.051        | -0.03 | 0.74         |
| IL8       | -0.08 | 0.45         | -0.03 | 0.79         | 0.04  | 0.68         | 0.12  | 0.24         |
| IL12A     | 0.17  | 0.1          | 0.11  | 0.28         | -0.07 | 0.47         | -0.06 | 0.55         |
| IL12B     | 0.11  | 0.28         | 0.05  | 0.62         | 0.17  | 0.1          | 0.2   | 0.044        |
| IL17A     | 0.13  | 0.22         | 0.06  | 0.54         | 0.03  | 0.75         | -0.08 | 0.44         |
| IL17B     | 0.13  | 0.19         | 0.11  | 0.26         | 0.1   | 0.32         | 0.31  | 0.002        |
| IL17C     | 0.15  | 0.15         | 0.19  | 0.057        | 0.03  | 0.76         | -0.02 | 0.83         |
| IL17D     | 0.18  | 0.075        | 0.15  | 0.15         | -0.03 | 0.76         | 0.01  | 0.96         |
| IL17F     | 0.1   | 0.31         | 0.11  | 0.3          | 0.06  | 0.58         | 0     | 0.97         |
| IL17RA    | 0.3   | 0.0032       | 0.39  | 8.3e-05      | 0.28  | 0.0057       | 0.1   | 0.32         |
| IL17RC    | 0.13  | 0.21         | 0.28  | 0.0051       | -0.15 | 0.14         | -0.15 | 0.14         |
| IL18      | -0.2  | 0.051        | -0.24 | 0.019        | -0.18 | 0.087        | -0.13 | 0.21         |
| IL22      | 0.01  | 0.92         | 0.03  | 0.8          | 0.14  | 0.17         | 0.04  | 0.72         |
| IL22RA1   | -0.05 | 0.63         | 0.09  | 0.38         | -0.03 | 0.77         | -0.29 | 0.0035       |
| IL22RA2   | 0.14  | 0.17         | 0.03  | 0.75         | 0.15  | 0.14         | 0.13  | 0.2          |
| IL23A     | 0.07  | 0.47         | 0.16  | 0.13         | 0.18  | 0.076        | -0.07 | 0.51         |
| IL23R     | 0.2   | 0.045        | 0.12  | 0.23         | 0.1   | 0.34         | 0.22  | 0.034        |
| CXCL3     | 0.2   | 0.046        | 0.23  | 0.024        | 0.24  | 0.019        | 0.21  | 0.037        |
| CXCL5     | 0.01  | 0.96         | -0.02 | 0.85         | 0.21  | 0.034        | 0.22  | 0.031        |
| CCR6      | 0.57  | 1.6e-09      | 0.5   | 3.1e-07      | 0.49  | 2.7e-07      | 0.32  | 0.0015       |
| CCL20     | -0.17 | 0.1          | -0.26 | 0.009        | -0.06 | 0.56         | 0.03  | 0.75         |
| TNF       | 0.63  | <2e-16       | 0.6   | <2e-16       | 0.45  | 3.5e-06      | 0.25  | 0.015        |
| TNFSF11   | 0.38  | 9.9e-05      | 0.41  | 3.3e-05      | 0.37  | 0.00016      | 0.25  | 0.014        |
| TGFB1     | 0.47  | 1.7e-06      | 0.6   | <2e-16       | 0.2   | 0.043        | 0.17  | 0.088        |
| TGFB2     | -0.23 | 0.023        | -0.34 | 0.00056      | -0.01 | 0.94         | 0.26  | 0.0097       |
| TGFB3     | 0.22  | 0.031        | 0.23  | 0.024        | 0.24  | 0.017        | 0.5   | 2.6e-07      |
| RORgammaT | -0.02 | 0.84         | 0.06  | 0.53         | 0.07  | 0.52         | 0.08  | 0.45         |

**Table S14.** TCR gene segments correlation with IL-17**TRGV**

| Gene   | IL17A | P-val |
|--------|-------|-------|
| TRGV1  | 0.03  | 0.76  |
| TRGV10 | 0.01  | 0.94  |
| TRGV2  | -0.05 | 0.64  |
| TRGV3  | 0.02  | 0.83  |
| TRGV4  | -0.01 | 0.9   |
| TRGV5  | -0.01 | 0.9   |
| TRGV5P | 0.04  | 0.7   |
| TRGV8  | 0.1   | 0.35  |
| TRGV9  | 0.13  | 0.21  |

**TRDV**

| Gene  | IL17A | P-val |
|-------|-------|-------|
| TRDV1 | -0.01 | 0.94  |
| TRDV2 | -0.09 | 0.36  |
| TRDV3 | -0.09 | 0.39  |

**TRBV**

| Gene         | IL17A | P-val |
|--------------|-------|-------|
| TRBV10-1     | 0.02  | 0.87  |
| TRBV10-2     | 0.11  | 0.28  |
| TRBV10-3     | 0.04  | 0.68  |
| TRBV11-1     | -0.02 | 0.86  |
| TRBV11-2     | -0.05 | 0.61  |
| TRBV11-3     | 0.12  | 0.26  |
| TRBV12-3     | -0.04 | 0.67  |
| TRBV12-4     | -0.08 | 0.44  |
| TRBV12-5     | -0.04 | 0.68  |
| TRBV13       | -0.11 | 0.29  |
| TRBV14       | 0.11  | 0.29  |
| TRBV15       | 0.01  | 0.95  |
| TRBV18       | 0.16  | 0.11  |
| TRBV19       | -0.01 | 0.94  |
| TRBV2        | 0.07  | 0.52  |
| TRBV20-1     | 0.08  | 0.42  |
| TRBV21-1     | -0.14 | 0.18  |
| TRBV23-1     | -0.04 | 0.72  |
| TRBV24-1     | 0.14  | 0.19  |
| TRBV25-1     | 0.21  | 0.037 |
| TRBV26/OR9-2 | 0.01  | 0.89  |
| TRBV27       | 0     | 0.99  |
| TRBV28       | 0.01  | 0.92  |
| TRBV29-1     | -0.01 | 0.89  |
| TRBV29/OR9-2 | 0.07  | 0.52  |
| TRBV3-1      | -0.01 | 0.94  |
| TRBV3-2      | -0.04 | 0.69  |
| TRBV30       | -0.01 | 0.91  |



|         |       |       |
|---------|-------|-------|
| TRBV4-1 | 0.05  | 0.64  |
| TRBV4-2 | 0.07  | 0.52  |
| TRBV4-3 | 0.01  | 0.95  |
| TRBV5-1 | 0.14  | 0.18  |
| TRBV5-4 | 0.12  | 0.25  |
| TRBV5-5 | -0.05 | 0.62  |
| TRBV5-6 | 0.08  | 0.45  |
| TRBV5-8 | 0.12  | 0.23  |
| TRBV6-1 | 0.04  | 0.67  |
| TRBV6-4 | 0.15  | 0.15  |
| TRBV6-5 | -0.1  | 0.34  |
| TRBV6-6 | -0.1  | 0.33  |
| TRBV7-2 | -0.15 | 0.15  |
| TRBV7-3 | -0.13 | 0.21  |
| TRBV7-6 | -0.04 | 0.72  |
| TRBV7-7 | 0.19  | 0.068 |
| TRBV7-8 | 0     | 1     |
| TRBV7-9 | 0.08  | 0.43  |
| TRBV9   | 0.13  | 0.21  |

#### TRAV

| Gene       | IL17A | P-val |
|------------|-------|-------|
| TRAV1-1    | 0.12  | 0.22  |
| TRAV1-2    | 0.13  | 0.22  |
| TRAV10     | -0.07 | 0.52  |
| TRAV12-1   | 0.06  | 0.55  |
| TRAV12-2   | 0.04  | 0.68  |
| TRAV12-3   | 0.07  | 0.49  |
| TRAV13-1   | 0.06  | 0.56  |
| TRAV13-2   | 0.12  | 0.23  |
| TRAV14/DV4 | 0.03  | 0.74  |
| TRAV16     | 0.08  | 0.42  |
| TRAV17     | 0.05  | 0.6   |
| TRAV18     | 0.19  | 0.067 |
| TRAV19     | 0.07  | 0.52  |
| TRAV2      | -0.03 | 0.81  |
| TRAV20     | -0.02 | 0.87  |
| TRAV21     | 0.04  | 0.69  |
| TRAV22     | -0.07 | 0.48  |
| TRAV23/DV6 | -0.04 | 0.69  |
| TRAV24     | 0     | 0.99  |
| TRAV25     | 0.09  | 0.4   |
| TRAV26-1   | 0.21  | 0.039 |
| TRAV26-2   | -0.04 | 0.67  |
| TRAV27     | 0.07  | 0.48  |
| TRAV29/DV5 | 0.22  | 0.029 |
| TRAV3      | 0.12  | 0.23  |
| TRAV30     | 0.1   | 0.31  |
| TRAV34     | 0.11  | 0.3   |
| TRAV35     | 0.06  | 0.53  |

|              |       |       |
|--------------|-------|-------|
| TRAV36/DV7   | 0.08  | 0.46  |
| TRAV38-1     | 0.02  | 0.85  |
| TRAV38-2/DV8 | -0.13 | 0.2   |
| TRAV39       | 0     | 0.98  |
| TRAV4        | 0.18  | 0.075 |
| TRAV41       | 0     | 0.99  |
| TRAV5        | -0.07 | 0.5   |
| TRAV6        | 0.18  | 0.082 |
| TRAV8-1      | 0.07  | 0.52  |
| TRAV8-2      | 0     | 0.98  |
| TRAV8-3      | -0.03 | 0.75  |
| TRAV8-4      | 0.13  | 0.19  |
| TRAV8-6      | 0     | 0.99  |
| TRAV9-2      | 0.14  | 0.19  |

**Table S15.** TRGV5 correlation with IL-36 genes

| Gene   | Correlation | p-val   | FDR     |
|--------|-------------|---------|---------|
| IL36A  | 0.43        | 9.9e-06 | 4e-05   |
| IL36B  | 0.36        | 0.00041 | 0.00082 |
| IL36RN | 0.32        | 0.00154 | 0.00205 |
| IL36G  | 0.29        | 0.00407 | 0.00407 |
